# Supplementary material
Source: publisher figshare collection journal article supplement (https://gsajournals.figshare.com/articles/dataset/_/7862531)
Supplement: Supplementary file 1 [file 1]

**Table S1** Powdery mildew rating scale according to the guidelines of the German Seed Board (Bundessortenamt 2000)

([http://www.bundessortenamt.de/internet30/fileadmin/Files/PDF/Richtlinie\\_LW2000.pdf](http://www.bundessortenamt.de/internet30/fileadmin/Files/PDF/Richtlinie_LW2000.pdf); Chapter 2.7.4)

| Disease score | Leaf area coverage % | Infection type       |
|---------------|----------------------|----------------------|
| 1             | 0                    | No disease           |
| 2             | > 0 - 2              | Very low to low      |
| 3             | > 2 - 5              | Low                  |
| 4             | > 5 - 8              | Low to intermediate  |
| 5             | > 8 - 14             | Intermediate         |
| 6             | > 14 - 22            | Intermediate to high |
| 7             | > 22 - 37            | High                 |
| 8             | > 37 - 61            | High to very high    |
| 9             | > 61 - 100           | Very high            |

Table adopted from Mohler *et al.* 2013.
