# Supplementary material
Source: publisher figshare collection journal article supplement (https://gsajournals.figshare.com/articles/dataset/_/7862531)
Supplement: Supplementary file 1 [file 1]

## Sheet: Tabelle1
Line	16RG_PM	17FS1_PM	16FS1_STB	17FS1_STB	16FS2_TS	17FS2_TS	17SL_TS	16FS1_LAD	16FS2_LAD	17SL_LAD	17FS1_LAD	16FS1_EET	16FS2_EET	17FS1_EET	17FS2_EET	17SL_EET	16FS1_PH	16FS2_PH	17FS1_PH	17FS2_PH	17SL_PH
BMW 2001	0.92	3.54	19.04	11	20.46	12.09	25.5	8.29	6.99	4.92	7.98	32.23	35.57	33.53	33.52	37.05	102.3	97.23	100.54	99.94	92.64
BMW 2002	1.03	1.33	23.03	13.32	44.69	33.91	56.69	4.11	3.91	6.82	7.09	32.64	34.81	34.88	33.48	37.2	95.63	96.4	96.43	89.33	81.27
BMW 2003	1	2.34	29.62	14.5	27.71	13.5	37.05	5.09	3.93	4.65	4.25	40.33	40.23	37.95	37.48	39.3	99.05	97.08	96.7	97.04	87.62
BMW 2004	4.34	7.22	44.41	15.82	28.8	18.09	42.05	4.94	3.99	5.65	5.96	32.55	33.1	33.54	33.04	33.3	109.95	99.58	106.16	100	94.12
BMW 2005	1.77	1.29	61.9	41.55	58.85	20.17	51.43	4.81	4.95	3.69	5.07	31.89	31.75	33.49	33.03	37.3	96.95	90.37	96.17	101.06	84.75
BMW 2006	1.94	2.14	47.51	12.39	47.99	7.55	38.54	4.79	6.22	7.88	7.07	31.59	31.8	33.98	33.01	35.1	124.2	114.4	115.82	111.79	97.86
BMW 2007	3.85	7.69	49.41	28.29	53.76	28.69	55.5	6.94	6.9	6.92	5.08	31.55	35.07	34.49	33.55	37.05	104.95	95.83	103.34	96.72	89.64
BMW 2008	1.09	1.85	29.9	11.82	20.44	9.3	32.7	7.91	6.08	5.47	8.85	31.61	34.93	33	33.01	35.31	109.29	96.88	102.8	97.94	94.35
BMW 2009	1.27	0.56	41.47	10.94	33.86	22.9	57.7	1.03	2.88	3.47	0.94	34.39	35.4	34.08	33.48	37.31	107.85	102	111.05	101.48	95.35
BMW 2012	2.01	6.34	69.82	22.4	27.76	16.76	55.23	8.02	8.09	7.72	7.94	31.25	35.3	33.51	32.04	37.15	114.87	99.74	106.29	101.27	93.23
BMW 2013	0.97	4.13	62.12	16.26	23.28	16.4	42.7	3.09	5.1	6.47	4.91	35.83	37	35.14	35.98	37.31	95.55	98.81	107.27	105.98	93.85
BMW 2015	2.42	1.54	79.76	64.7	41.36	30.56	56.15	6.84	4.88	5.89	5.9	35.69	37.65	41.08	36.06	37.09	100.5	98.2	103.52	99.41	80.27
BMW 2018	2.52	2.15	25.56	10.73	39.26	16.23	36.15	4.73	6.96	5.89	7.03	34	36.63	36.09	34.52	37.09	113.29	103.53	109.9	99.94	93.77
BMW 2020	1.59	2.11	52.55	18.26	23.95	16.66	23.84	6.86	6.85	7.88	6.91	34.95	36.76	35.08	36.42	37.1	110.58	106.76	111.86	104.83	99.36
BMW 2022	0.84	0.71	30.48	20.92	54.44	43.09	77.05	2.96	3.05	3.65	4.05	32.62	33.31	33.99	33.04	32.3	91.03	84.48	95.28	90	77.12
BMW 2023	4.03	8.79	24.48	10.65	32.64	14.52	36.69	2.87	2.21	2.82	3.18	34.27	36.18	36	33.96	37.2	99.44	91.09	91.23	91.93	78.77
BMW 2024	2.82	8.34	55.46	15	33.53	13.95	40.5	5.14	3.07	3.92	4.25	33.27	37.29	35.45	34.54	37.05	101.91	90.79	99.2	97.94	85.14
BMW 2025	1.04	6.6	45.96	18.97	26.58	7.31	30.5	6.06	5.01	7.92	6.94	31.14	33.08	33.44	33.54	37.05	110.53	108.67	104.41	102.9	94.64
BMW 2026	1.18	7.44	32.6	26.62	57.91	39.44	56.43	4.16	3.94	2.69	5.98	32.74	34.2	33.39	33.04	37.3	119.61	109.16	116.26	108.15	98.75
BMW 2027	1.98	3.37	31.07	37.78	25.17	26.9	72.73	4.03	5.08	4.76	7.14	31.92	35.1	34.05	33.98	35.14	87.11	82.99	88.25	82.98	72.44
BMW 2028	1.99	2.34	56.05	31.5	47.91	30.31	63.98	8.92	7.99	5.54	3.25	32.19	34.83	35.45	33.53	37.3	106.79	107.01	102.2	99.36	87.29
BMW 2029	0.69	2.19	57.51	60.68	44.02	15.97	50.23	6.66	6.07	6.72	8.21	32.07	33.44	32.56	33.97	35.15	85.19	81.09	86.43	81.57	71.23
BMW 2030	2.02	3.04	51.66	47.98	27.25	29	58.98	4.14	4.87	3.54	6.14	33.84	32.87	33.03	32.48	32.3	85.1	83.14	84.83	81	73.29
BMW 2031	1.11	1.97	48.92	38.54	37.97	13.02	57.05	9.06	7.89	3.65	7.11	35.56	37.82	36.43	35.96	37.3	105.65	99.18	108.18	105.43	88.12
BMW 2032	5.81	6.59	70.71	40.95	28.43	8.99	33.54	6.09	3.94	4.88	4.9	32.96	35.03	34.52	33.49	35.1	110.5	100.3	109.79	102.45	90.36
BMW 2033	4.09	8.04	57.27	58.5	17.63	21.35	52.7	5.85	6.12	1.47	5.98	34.4	34.11	34.03	33.01	37.31	90.68	89.63	97.04	93.91	81.85
BMW 2034	0.88	1.43	47.74	22.2	32.24	39.67	66.15	8.23	7.96	3.89	5.87	33.93	35.2	36.07	33.08	37.09	105.47	103.13	102.65	96.53	88.27
BMW 2036	3.48	6.69	75.74	74.88	26.28	23.05	68.54	8.82	4.91	3.88	5.08	30.76	30.53	31.45	31.99	35.1	95.7	91.36	91.35	85.09	80.86
BMW 2037	3.1	4.71	63.05	46.07	24.49	12.09	52.73	6.93	6.04	6.76	6.77	32.49	36.23	33.94	34.5	35.14	115.25	106.86	111.41	101.81	89.44
BMW 2038	2.19	3.56	31.14	33.44	22.53	59.5	42.7	4.93	2.96	4.47	3.94	31.85	33.51	34.08	32	33.31	105.08	100.11	102.05	88.73	86.35
BMW 2039	0.99	1.16	47.49	36.22	37.6	5.41	36.15	8.98	7.16	1.89	6.22	38.08	37.86	38.94	37.46	37.48	94.16	86.86	90.84	85.16	76.27
BMW 2041	1.08	4.43	36.54	11.87	38.3	10.4	26.43	4.29	5.11	3.69	3.13	36.73	37.5	36.99	37.01	38.3	120.8	109.55	119.54	109.67	96.75
BMW 2042	2.85	1.97	49.13	19.65	33.8	34.07	51.43	6.84	4.92	4.69	5.92	37.09	38.53	38.06	36.05	38.3	108.32	98.1	102.26	98.69	85.75
BMW 2043	2.09	4.62	87.51	35.12	23.09	14.9	38.54	6.66	5.1	2.88	4.05	32.57	33.67	33.51	32.98	37.1	105.69	110.81	109.71	98.98	94.36
BMW 2044	4.11	6.63	59.9	46.26	37.26	34.3	71.15	3.79	4.73	5.89	4.91	32	33.62	34.64	33.47	35.09	92.77	84.19	92.77	86.49	75.77
BMW 2045	0.99	2.46	30.05	24.58	24.03	7.58	52.05	2.86	3.99	3.65	6.03	31.45	33.66	33.02	33.03	35.3	99.08	96.12	97.72	93.82	87.62
BMW 2046	1.48	6.79	80.3	48.95	33.72	21.54	67.73	4.18	3.03	2.76	5.92	32.41	32.98	33.52	33.5	37.14	104.96	104.66	104.77	97.11	89.94
BMW 2047	2.3	3.72	38.95	23.15	27.94	15.77	32.73	5.22	4.08	3.76	6.91	36.87	36.43	37.61	34.53	37.14	90.31	86.88	85.97	78.8	74.44
BMW 2048	2.01	2.93	82.48	43.21	17.03	42.55	75.5	7.8	6.01	4.92	5.04	33.39	37.06	34.53	34.51	37.05	96.94	94.1	98.24	95.79	81.14
BMW 2050	3.8	8.14	87.6	77.15	28.23	23.73	51.43	3.36	4.92	5.69	6	30.57	32.54	31.48	30.96	33.3	108.03	100.44	103.67	96.36	85.25
BMW 2051	0.96	1.32	40.54	11.08	16	10.56	28.98	5.22	5.08	5.54	5.08	39.88	40.45	41.05	37.4	37.3	96.52	90.86	99.03	92.34	82.29
BMW 2052	5.29	8.27	50.05	19.35	10.89	10.28	27.7	3	3.96	7.47	5.01	36.55	36.95	36.08	34.58	37.31	106.03	104.83	104.85	101.34	90.35
BMW 2054	3.65	4.64	80.75	54.65	23.45	9.09	56.15	6.15	4.17	5.89	6	35.36	35.23	35.98	34.5	37.09	100.11	97.64	95.17	96.81	85.77
BMW 2055	2.61	8.97	75.73	81.04	53.91	31.48	45.23	8.01	6.16	5.72	7.11	32.25	33.7	32.93	33.07	35.15	103.66	92.73	98.68	95.47	85.73
BMW 2056	7.05	8.11	70.16	14.69	29.96	10.42	56.15	7.42	7.83	7.89	6.84	32.03	37.12	36.87	34.96	37.09	101.8	104.93	98.71	96.65	85.27
BMW 2058	1.49	0.98	39.9	22.02	41.53	22.54	54.73	3.05	3.81	5.18	3.95	35.92	36.87	37.01	34.99	36.89	89.86	84.36	90.29	82.84	76.13
BMW 2059	1.03	0.71	23.84	5.92	44.4	28.65	42.2	6.01	5.06	5.93	5.05	30.29	31.54	31.99	31.96	33.06	118.02	110.83	114.28	105.82	99.75
BMW 2060	1.67	0.65	71.91	28.5	22.53	29.4	50.94	7.94	6.9	7.15	7.98	33.55	37.08	34.47	33.48	37.05	104.95	96.92	98.94	90.98	83.64
BMW 2061	5.56	2.89	67.68	49.69	31.43	8.32	35.94	8.76	5.12	4.15	6.96	35.44	37.14	35.1	34.02	37.05	106.71	96.12	109.55	103.89	89.64
BMW 2062	1.89	5.72	58.08	73.15	12.54	17.72	47.24	8.09	6.06	7.22	6.91	33.92	32.87	33.61	32.04	31.88	82.77	76.49	83.47	78.68	71.34
BMW 2063	1.07	0.95	24.8	11.65	27.89	10.01	53.05	4.92	4.71	7.34	5.92	36.98	34.32	35.5	34.48	36.85	107.48	99.11	102.35	99.22	87.76
BMW 2065	1.49	2.61	42.39	11.79	30.18	15.8	51.56	7.23	6.91	8.11	4.19	34.27	36.06	33.98	33.5	37.05	112.82	107.29	111.58	102.86	92.02
BMW 2066	2.25	4.67	40.5	9.68	27.23	18.32	61.56	8.26	5.74	8.11	7.75	34.48	34.03	33.49	32.5	33.05	94.84	84.06	97.85	89.1	82.52
BMW 2068	1.01	2.91	79.35	45.22	29.52	13.59	64.73	4.21	4.84	6.18	6.91	32.69	35.01	33.57	33.53	36.89	97.91	88.49	96.01	87.85	86.63
BMW 2069	1.6	3.18	60.94	20.64	28.67	12.81	56.56	2.94	4.1	4.11	5.82	35.71	35.88	33.42	33.54	35.05	103.45	102.42	108.44	96.9	93.02
BMW 2071	1.03	0.67	35.73	18.42	27.94	7.49	30.94	1.03	0.92	3.15	1.91	41.29	41.64	41.99	39.99	43.05	111.92	111.81	116.14	109.1	94.14
BMW 2073	1.25	2.2	39.69	18.5	12.67	18.28	44.73	2.97	3.08	3.18	0.99	35.09	35.1	34.56	34.49	36.89	87.12	82.99	91.62	89.26	76.63
BMW 2075	1.91	2.72	26.38	16.12	22.08	10.02	43.49	1.86	2.94	2.99	3.02	38.18	39.67	37.95	36.96	38.05	107.21	96.76	105.51	103.43	94.19
BMW 2077	1.5	1.45	37.11	10.5	32.6	29.73	46.2	4.89	7.01	4.27	8.11	31.86	34.99	34	33.01	37.94	113.21	105.63	107.48	103.22	91.17
BMW 2080	1.73	7.58	22.98	8.64	27.61	8.47	60.01	2.05	3.31	2.38	0.85	36.82	37.62	37.48	34.97	36.8	82.15	76.16	80.64	75.57	64.54
BMW 2081	1.97	5.32	30.5	10.37	32.63	22.24	67.24	4.26	4.01	6.22	6.99	37.26	38.48	39.04	35.96	37.88	95.09	84.61	89.33	88.55	72.84
BMW 2082	3.24	1.57	29.38	18.02	17.35	8.72	47.24	8.13	7.94	4.22	8.91	37.47	37.98	36.47	34.99	37.88	95.59	85.75	94.92	94.81	80.84
BMW 2083	0.99	6.49	17.51	13.03	21.22	23	57.24	3	4.88	5.22	5.95	39.83	39.74	39.95	36.48	37.88	94.9	95.85	94.41	90.54	77.34
BMW 2086	0.91	2.55	53.37	23.47	21.55	17.03	40.01	3.03	5.06	6.38	6.04	32.52	34.1	33.1	33	36.8	109.58	100.46	107.57	107.15	91.04
BMW 2087	0.99	1.11	25.73	10.2	33.98	9.42	49.73	2.83	4.14	6.18	5.1	37.57	39.32	34.58	36	36.89	102.75	94.68	104.15	93.25	89.63
BMW 2088	2.32	3.51	32.28	12.63	22.06	14.7	50.94	5.98	4.87	3.15	7.07	36.8	37.19	35.37	33.53	37.05	114.45	106.4	110.54	104.2	97.14
BMW 2089	2.13	1.22	52.12	19.19	29.2	17.01	48.49	5.09	3.86	5.99	7.99	32.33	32.32	32.47	33.04	33.05	81.55	77.35	85.95	81	69.69
BMW 2090	1.13	1.64	62.11	12.32	26.47	14.38	60.94	4.11	5.03	4.15	5.03	32.64	33.98	32.49	32.94	37.05	113.34	107.71	114.89	107.43	93.64
BMW 2091	2.58	3.85	26.92	18.32	27.89	19.38	60.94	2.95	3.86	5.15	3.85	32	35.78	33.5	33.01	37.05	109.9	102.37	103.3	99.71	92.64
BMW 2092	1.06	0.45	28.57	11.16	14.53	15.62	50.66	2.14	4.1	4.35	2.99	40.36	38.18	37.56	34.01	36.84	85.82	82.36	85.46	85.36	78.17
BMW 2093	2.98	4.91	34.62	14.07	17.65	8.62	46.56	3.42	6.26	5.11	5.97	35.39	37.16	34.96	33.93	37.05	96.62	94.28	101.56	87.86	86.02
BMW 2094	1.01	1.15	77.67	76	31.09	59.81	73.49	7.91	6	6.99	6.98	30.84	32.21	30.97	31.42	30.55	91.69	83.3	88.94	80.89	78.19
BMW 2095	1.08	3.33	68.64	64.82	22.86	39.72	80.01	2.9	4.98	5.38	7.09	32.46	32.73	32.38	32.05	34.8	79.9	77.4	78.43	72.97	63.54
BMW 2096	7.45	7.97	79.9	43.54	34.96	54.82	70.94	3.79	5.01	4.15	7.11	31.07	31.77	31.93	32.46	35.05	103.77	99.81	96.68	99.76	85.64
BMW 2097	1.03	2.98	24.89	14.23	30.41	8.46	57.24	8.23	6	4.22	5.15	36.77	38.65	35.89	36.51	37.88	117.32	107.16	107.42	105.42	93.34
BMW 2098	0.82	0.95	26.58	10.52	24.34	10.29	56.56	2.92	2.95	4.11	5.18	31.94	36.24	33.57	32.97	37.05	112.87	103.56	103.62	103.69	87.52
BMW 2099	2.95	3	46.03	18.4	43.72	30.56	68.05	3.17	3.03	3.34	3.81	36.58	36.48	38.95	34.56	34.85	113.64	113.66	116.78	117.91	101.76
BMW 2100	2.2	2.16	22.85	23.75	27.04	15.16	70.94	0.96	3.1	5.15	4.07	36.94	33.74	34.02	33.47	37.05	96.08	91	105.51	95.51	82.64
BMW 2106	0.99	1.08	31.95	10.89	25.07	11.58	54.73	4.89	5.22	5.18	4	35.68	36.66	34.91	37.47	36.89	102.43	95.41	95.85	92.51	78.13
BMW 2107	1.54	1.46	87.34	40.97	18.21	20.67	63.49	5.15	6.04	4.99	7.01	34.86	34.74	35.99	34.03	37.05	100.32	92.97	97.79	89.56	81.69
BMW 2108	0.89	3.01	70.06	60.1	31.33	27.36	66.56	7.95	7.86	4.11	6.07	33.83	34.4	33.56	33.46	37.05	103.51	96.76	100.93	92.99	85.02
BMW 2109	4	6.7	30.43	18.58	29.81	13	51.56	5.32	7.03	6.11	6.01	33.54	34.03	33.97	33.03	37.05	107.6	101.71	105.43	102.24	83.52
BMW 2111	1.62	6.74	48.67	49.7	35.4	12.65	34.73	6.88	6.89	4.18	7.98	34.66	37	35.93	35.48	36.89	107.66	102.95	107.8	98.77	92.63
BMW 2112	3.7	6.47	24.78	51.04	23.34	40.35	72.2	8.98	6.98	5.93	7.11	32.8	36.28	35.43	34.55	37.06	80.95	72.68	79.68	74.37	63.25
BMW 2113	1.97	5.74	57.33	39.83	19.09	15.94	63.05	4.27	4.28	6.34	6.25	33.91	36.65	33.91	33.48	36.85	103.61	94.2	98.38	95.34	80.26
BMW 2114	1.03	1.27	92.48	53.85	23.68	53.8	69.73	5.73	3.04	3.18	4.09	37	37.17	33.92	33.04	36.89	91.79	82.6	92.69	86.68	76.63
BMW 2116	4.12	5.27	35.18	41.02	40.46	39	67.2	1.76	2.99	4.93	3.12	30.94	32.07	33.02	30.98	33.06	98.71	91.73	96.7	93.54	79.75
BMW 2118	5.89	6.7	89.94	93.32	23.8	35.26	60.66	7.6	4.94	6.35	4.96	31.88	33.31	33.47	33.04	36.84	91.1	85.13	89.75	82.27	75.17
BMW 2119	1.46	1	24.61	15.9	25.71	12.22	60.92	2.8	3.15	4.69	4.81	36.53	35.58	35.95	34.55	37.12	101.08	103.86	99.78	98.97	94.63
BMW 2120	1.32	3.49	57.43	44.19	36.96	24.82	53.73	6.01	7.11	2.14	4.93	31.21	32.63	31.54	32.96	36.86	111.95	111.07	110.35	102.26	92.92
BMW 2121	1.75	6.29	25.03	10.45	27.22	12.75	49.37	1.82	4.04	3.1	5.92	34.18	36.3	36.02	33.99	36.9	103.52	101.4	110.77	103.95	94.04
BMW 2124	1.46	5.48	53.32	20.52	49.26	38.62	69.37	5.76	5.12	5.1	5.95	31.62	36.34	34.01	33.93	36.9	110.17	101.36	106.29	95.36	87.54
BMW 2125	5.18	8.65	19.2	8.5	28.91	10.05	69.92	2.01	2.93	4.03	4.98	34.72	34.62	36.97	33.51	37	104.12	98.07	100.44	97.29	83.05
BMW 2126	0.85	2.12	70.36	12.78	38.99	17.31	81.76	1.7	3.15	3.09	4.02	38.37	37.54	38	37.53	36.91	113.73	105.37	111.3	104.38	97.14
BMW 2127	1.08	7.72	31.65	12.2	26.99	13.4	59.92	5.99	8.01	7.03	9.05	36.82	36.56	34.56	34.44	37	98.55	95.7	98.74	92.64	78.05
BMW 2128	2.08	6.4	33.66	41.43	23.96	9.42	40.92	4.12	4.05	2.69	5	34.44	36.07	35.93	33.48	37.12	96.48	86.27	92.62	82.36	72.13
BMW 2129	0.91	1.4	72.72	27.05	9.99	17.32	34.66	2.89	3.05	1.9	4.93	36.84	32.95	33.54	33.49	33.11	96.01	94.67	101.45	96.38	82.02
BMW 2130	3.98	4.03	44.78	27.57	33.47	12.12	39.37	7.98	6	3.1	7.02	37.3	38.37	36.91	35.93	37.9	96.45	99.16	101.54	96.08	85.04
BMW 2131	1.04	1.2	33.29	18.08	50.47	48.42	75.92	3.9	2.89	4.69	6.01	34.05	34.06	33.97	33.01	35.12	91.68	83.06	88.93	85.15	75.63
BMW 2132	3.05	0.31	45.13	34.49	22.49	21.43	68.45	6.12	5.05	8.94	8.9	37.96	38.45	38.59	34.56	36.95	83.81	79.17	82.56	80.25	66.51
BMW 2133	4.71	7.8	70.02	25.43	29.89	7.44	35.92	7.77	7.01	7.69	7.03	32.51	32.44	33.49	32.98	37.12	103.4	98.15	101.32	97.84	86.63
BMW 2134	4.47	8.46	64.69	18.1	28.5	16.06	47.21	4.27	4.08	4.75	5.95	34.15	36.45	35.61	34.54	37.11	105.32	92.86	102.46	100.77	86.57
BMW 2135	0.97	1.69	18.04	4.52	27.25	14.93	58.45	5.22	5.11	3.94	2.77	36.88	39.74	37.52	37.06	40.95	109.02	103.24	102.7	98.75	86.51
BMW 2136	1.09	2.14	26.55	19.32	32.25	18.35	50.92	5.99	4.02	5.69	4.03	32.37	35.03	35.49	35.47	37.12	82.11	78.96	83.39	76.51	66.13
BMW 2137	0.98	1.06	25.45	12.9	43.32	27.91	72.21	2.91	3.15	3.75	5.19	35.1	35	35.93	33.47	37.11	93.56	96.83	101.35	97.01	81.57
BMW 2139	1.55	4.75	31.65	11.52	57.19	17.51	63.45	2.65	2.91	3.94	5.1	36.44	35.31	35.92	34.52	36.95	105.44	101.4	106.31	104.18	83.01
BMW 2140	2.18	4.64	45.21	15.06	44.08	14.16	48.45	4.91	4.92	7.94	6.03	32.44	36.71	34.42	33.97	36.95	115.93	110.27	113.43	109.01	88.51
BMW 2141	2.96	7.14	40.45	43.39	39.69	18.51	48.45	4.05	3.2	4.94	7.07	33.91	33.67	34.48	32.98	36.95	102.63	98.15	109.32	104.73	87.51
BMW 2142	5.66	8.96	45.87	54.11	26.78	47.53	65.27	5.18	6.91	5.86	8.95	36.35	35.99	36.5	34.97	37.11	88.6	83.51	87.85	81.23	71.4
BMW 2143	4.07	3.61	21.17	14.92	38.08	12.56	40.96	6.88	5.15	5.98	5.82	35.66	37.17	36.94	36.9	36.95	94.66	89.11	93.53	84.84	78.72
BMW 2144	0.99	1.15	32.19	46	57.63	24.31	68.45	8.82	7	5.94	7.98	33.15	35.5	37.97	34.03	36.95	93.53	86.7	92.94	95.38	74.51
BMW 2145	1.68	4.88	51.55	60.02	45.3	21.26	76.76	4.99	5.17	4.09	5.98	34.87	36.26	36.07	34.94	36.91	95.61	93.96	97.99	94.23	80.64
BMW 2146	2.37	1.19	32.26	37.48	27.63	30.32	69.92	1.19	3.12	3.03	3.1	33.27	33.11	32.44	32.99	37	94.28	89.63	94.77	92.38	80.55
BMW 2148	4.43	6.67	51.83	14.35	51.79	19.77	44.37	3.08	4.92	6.1	5.13	32.58	34.22	34.48	33.53	36.9	111.96	105.32	109.89	106.8	96.04
BMW 2151	4.47	4.85	47.6	35.99	37.24	23.07	49.66	4.36	2.9	2.9	6.08	39.07	39	41.48	38.05	39.11	91.03	83.82	87.92	84.69	79.02
BMW 2152	2.02	2.9	37.39	21.74	30.56	14.15	50.27	3.23	3.03	6.86	4.95	37.77	37.69	38.93	35.96	38.11	111.32	103.95	104.21	102.78	93.9
BMW 2153	1.78	2.71	48.57	20.16	35.86	21.61	69.66	3.14	4.95	7.9	6.04	34.86	36.22	34.58	34.57	37.11	102.82	99.07	100.15	97.09	86.52
BMW 2154	1.35	2.11	17.98	13.92	32.73	16.49	64.66	2.96	3.94	2.9	4.82	36.62	38.58	38.94	35.55	38.11	91.03	82.5	89.03	89.84	77.52
BMW 2155	0.9	2.19	41.23	31.55	20.77	13.01	54.37	4.95	4.08	9.1	6.03	36.47	36.54	36.11	34.04	36.9	101.03	94.93	99.72	103.5	84.54
BMW 2156	1.14	0.92	36.91	61.37	56.04	66.6	60.27	7.13	5.08	5.86	5.95	31.55	31.76	32.98	31.49	33.11	114.74	107.7	110.63	106.5	93.9
BMW 2157	2.96	2.9	19.2	7.05	65.95	19.42	45.27	5.91	4.17	7.86	6.94	35.28	33.23	33.98	32.96	37.11	119.41	113.14	119.94	113.15	101.4
BMW 2162	2.93	3.96	25.34	15.83	44.36	17.27	64.37	5.1	5.2	5.1	6.08	39.98	37.42	38.06	35.02	37.1	102.36	104.44	108.05	103.34	90.04
BMW 2163	4.6	8.33	54.94	42.98	22.64	9.06	44.37	6.6	5.17	4.1	5.02	30.88	33.77	32.89	32.99	32.9	103.6	98.18	104.89	97.28	87.54
BMW 2164	1.15	0.78	44.83	32.74	23.74	20.32	39.37	7.27	3.95	6.1	7.03	34.41	35.74	35.05	34.05	36.9	103.61	97.69	103	94.96	91.04
BMW 2165	0.99	2.39	33.45	32.22	32.63	30.72	58.73	3.81	3.06	6.14	5.91	32.9	31.91	34.51	32.95	36.86	106.83	95.29	99.59	88.63	85.42
BMW 2166	2.07	0.86	25.6	38.19	23.55	17.75	75.96	3.28	3.22	6.98	5	31.34	32.53	33.05	32.97	31.95	92.29	81.5	87.44	83.03	72.22
BMW 2167	1.99	5.37	29.16	14.18	20.98	24.29	40.92	9.14	5.88	3.69	5.96	38.34	38.3	37.54	36.97	39.12	92.6	88.75	96.63	88.69	77.63
BMW 2168	1.05	1.29	29.13	13.15	35.86	20.79	78.73	3.17	4.95	5.14	7.18	34.47	36.72	35	34.47	36.86	97.43	95.07	96.23	90.69	85.42
BMW 2170	1.12	1.04	47.54	15.5	29.57	30.54	45.92	5.15	4.01	7.69	5.98	35.36	36.73	38.53	34.49	37.12	103.59	94.79	99.04	96.76	90.63
BMW 2172	1.85	6.78	46.86	70.24	17.86	44.64	61.76	6.88	4.02	5.09	6.03	36.81	37.12	39.05	34.55	37.1	87.31	83.09	84.5	82.21	74.64
BMW 2173	0.93	1.24	28.6	42.33	17.81	10.41	50.92	2.04	3.78	2.69	2.25	32.9	34.82	34.41	33.47	37.12	93.46	89.78	91.38	87.01	79.13
BMW 2175	2.02	3.37	28.79	41.68	43.51	15.99	60.96	5.24	6.22	4.98	5.96	33.65	34.72	35.04	34.05	36.95	91.14	87.16	91.13	89.81	80.72
BMW 2176	3.08	6.47	24.69	15.69	68.51	27	61.76	8.97	5.21	7.09	8.93	32.09	32.62	32.48	32.03	34.91	103.12	96.31	99.94	92.24	83.64
BMW 2177	4.24	3.74	33.49	32.2	14.27	15.68	48.45	5.99	2.85	1.94	4.98	36.47	37.13	35.93	34.51	37.95	97.3	81.59	89.3	82.28	75.01
BMW 2178	0.97	1.5	20.73	14.4	64.18	31.51	73.45	3.03	2.89	2.94	3.81	37.1	36.88	35.45	33.98	36.95	103.42	101.47	103.78	98.22	83.51
BMW 2179	1.09	3.27	15.02	13.85	25.32	30.59	57.09	2.77	4.01	6.05	6.09	32.01	34.71	32.92	33.5	36.9	85.4	80.9	82.69	77.31	68.16
BMW 2180	0.91	2.93	29.95	11.1	11.59	21.08	50.8	4.07	3.28	6.98	2.94	37.12	35.15	37.46	33.53	37.07	95.41	101.2	94.15	93.82	79.96
BMW 2181	4.26	8.02	27.71	17.75	24.81	32.27	55.8	4.91	5.01	4.98	7.14	35.94	36.69	36.07	34.02	37.07	91.93	96.46	90.39	86.34	72.46
BMW 2182	1.21	1.18	60.18	19.14	19.32	7.42	22.9	4.76	5.8	6.17	6.82	32.94	35.83	34.42	32.98	36.87	107.71	105.59	109.94	103.86	93.58
BMW 2184	3.22	3.33	25.22	11.91	18.37	7.99	44.87	3.75	5.13	4.21	6.11	39.53	37.73	38.5	34.55	36.82	91.95	90.27	89.66	86.81	77.86
BMW 2186	2.11	2.85	34.5	25.99	15.68	15.64	54.87	2.89	3.88	4.21	7.08	31.52	33.5	33.98	33.01	34.82	103.24	95.58	100.42	96.76	85.36
BMW 2187	1.02	3.4	68.77	50.24	33.67	21.67	51.06	5.9	6.1	4.11	6.95	30.56	33.88	33.43	33.03	36.96	95.19	89.42	99.21	91.06	80.49
BMW 2188	1.84	3.65	61.56	21.38	56.53	27.09	69.87	2.78	3.81	7.21	4.9	37.83	36.37	35	33.02	36.82	95.42	95.86	99.05	95.94	78.36
BMW 2190	1.5	2.19	47.26	57.95	55.99	28.44	65.8	2.84	3.14	2.98	3.08	34.19	36.14	34.95	33.5	37.07	103	103.46	99.35	100.91	83.96
BMW 2191	0.96	2.41	42.65	9.92	28.9	18.17	52.06	1.98	1.66	3.76	4.08	34.72	36.61	34.52	34.99	38.08	104.45	95.43	104.12	95.02	81.56
BMW 2192	0.94	2.62	37.67	71.62	39.81	41.09	77.09	3.11	3.01	3.05	3.05	31.84	33.69	33.51	33.02	32.9	89.9	78.46	85.71	81.44	71.16
BMW 2193	1.02	1.21	74.94	30.4	30.33	35.57	71.41	3.6	3.76	5.94	6.12	37.88	35.96	35.37	33.48	33.07	89.6	103.21	99.96	103.25	88.34
BMW 2195	2.15	3.97	54.61	27.48	41.11	40.92	62.09	2.8	3.01	4.05	7.94	32.53	34.22	34.52	33	36.9	90.08	88.45	94.2	84.75	76.16
BMW 2196	2.62	4.71	92.68	85.4	53.9	71.53	92.9	4.76	3.9	3.17	7.12	32.94	35.56	34.37	33.93	36.87	106.21	97.25	101.46	95.58	84.58
BMW 2197	4.6	5.88	65.44	47.95	36.87	25.71	59.59	4.99	5.17	4.01	6.06	33.98	36.02	33.98	33.46	36.91	105.53	98.63	105.2	97.64	86.95
BMW 2198	1.03	5.93	62.74	45.71	48.85	29.17	60.51	4.83	4.11	5.18	5.04	32.14	34.53	34.03	32.98	36.86	103.8	98.94	106.74	96.1	85.98
BMW 2199	1.05	0.72	49.84	31.65	30.05	41.75	56.41	7.15	6.87	5.94	6.98	31.36	32.37	33	31.92	37.07	108.82	105.63	106.6	98.86	86.34
BMW 2200	0.99	1.98	83.68	39.05	53.97	15.09	64.87	3.93	6.03	5.21	4.91	31.96	32.98	32.55	32.51	34.82	108.02	106.71	105.36	102.71	88.86
BMW 2202	0.88	6.3	52.13	24.79	22.64	8.72	22.09	9.03	8.09	6.05	6.94	35.97	37.84	37.54	36.96	40.9	116.66	113.63	112.62	105.76	97.16
BMW 2203	2.83	7.45	32.74	9.66	16.37	15.07	46.41	4.09	4.02	6.94	5.99	36.12	36.19	34.56	33.96	37.07	112.91	109.71	106.46	106.76	91.84
BMW 2204	3.06	8.19	86.91	47.09	28.73	23.47	34.59	3.94	4.96	4.01	6.13	36.55	34.99	36.11	35.97	37.91	91.45	89.4	92.34	88.07	78.45
BMW 2205	0.96	4.41	59.63	21.07	28.65	33.73	68.35	3.93	3.08	1.83	3.97	37.49	34.64	33.46	33	37.07	97.46	94.68	95.56	92.85	80.51
BMW 2206	0.89	0.82	42.67	11.71	33.22	29.68	55.51	1.91	3.04	3.18	1.8	35.34	33.57	33.52	33.01	32.86	83.19	76.55	82.37	80.35	65.48
BMW 2207	2.46	3.8	29.89	14.79	21.12	11.4	40.8	7.23	5.93	6.98	6.94	36.77	37.32	35.54	34.98	37.07	101.32	94.9	101.62	96.33	84.96
BMW 2208	0.98	1.42	41.6	14.62	7.88	19.5	57.06	8.05	7.93	5.76	5.84	37.33	37.07	34.96	33.08	37.08	103.89	99.56	101.43	102.22	85.56
BMW 2209	0.98	1.64	57.4	53.39	23.98	26.73	42.9	9.24	5.14	4.17	7.07	33.67	34.32	33.48	32.93	34.87	94.37	86.68	94.32	88.37	81.08
BMW 2211	4.12	4.92	41.05	21.37	31.78	25.52	62.06	6.92	4.91	5.76	5.95	34.19	36.99	34.98	33.04	37.08	86.79	81.51	90.63	84.59	73.06
BMW 2212	0.95	1.32	37.53	9.71	31.28	17.96	58.35	9.11	7.91	8.83	7.8	31.1	32.53	32.52	32.95	37.07	108.36	103.36	106.87	100.75	86.01
BMW 2213	2.05	1.11	53.46	23.42	22.92	14.5	55.8	8.06	6.12	3.98	4.82	31.14	32.9	32.94	32.5	33.07	106.53	102.3	104.03	93.73	86.96
BMW 2215	1.02	1.29	55.38	36.55	50.63	43.79	59.59	9.03	5.93	5.01	5.07	34.96	34.43	33.99	32.91	32.91	95.69	91.62	95.17	91.14	83.95
BMW 2216	2.85	4.54	23.25	34.7	21.07	22.81	57.09	7.15	7.14	5.05	5.9	37.86	39.13	39.58	37.07	38.9	83.11	75.79	87.02	80.47	71.66
BMW 2217	1.03	4.14	21.3	9.89	38.13	32.64	67.9	6.05	5.11	5.17	6.07	32.2	32.08	32.98	32	36.87	112.7	103.99	103.32	97.35	86.08
BMW 2218	0.88	2.6	31.18	9.9	52.3	19.79	57.9	2.93	5.13	8.17	7.99	30.46	31.2	30.98	32.47	33.87	109.52	108.5	108.77	99.26	93.08
BMW 2219	0.72	1.98	30.76	29.85	9.45	12.97	34.59	4.83	5.1	7.01	3.91	35.9	36.97	34.43	34.08	34.91	90.69	91.24	92.11	88.65	76.95
BMW 2220	2.9	4.61	54.69	20.2	13.48	15.22	62.09	4.27	4.88	6.05	7.1	34.15	37.3	35.08	33.96	36.9	91.82	82.75	91.65	85.76	76.16
BMW 2222	1.03	1.19	72.4	42.48	32.23	31.68	42.9	4.38	2.74	3.17	7.1	32.98	34.03	33.94	33.51	36.87	100.93	96.06	103.77	93.02	79.58
BMW 2223	1.65	0.83	35.45	14.48	27.53	11.49	59.87	2.91	2.9	4.21	2.02	36.6	35.58	37.89	34.99	36.82	102.56	96.92	99.39	95.1	81.86
BMW 2224	0.82	1.04	54.66	21.48	48.34	28.02	61.06	4.97	4.02	5.11	4.14	34.65	36.63	35.03	34.49	36.96	115.19	113.47	112.33	107.79	92.49
BMW 2226	1.37	3.03	67.48	37.75	18.53	15.35	56.41	7.8	6.07	7.94	7.94	31.89	34.29	31.63	33.04	37.07	94.44	90.79	88.62	89.26	76.34
BMW 2227	1.02	0.91	31.27	26.07	16.13	15.99	57.09	4.9	3.09	5.05	6.97	35.56	35.97	36.96	34.99	36.9	97.19	88.09	98.06	91.92	82.66
BMW 2228	1.84	1.1	34.13	17.9	37.61	8.29	66.06	2.84	4.31	7.11	4.99	31.09	33.12	33.48	33.47	32.96	94.82	89.16	96.77	90.19	78.99
BMW 2229	0.89	1.19	45.3	25.79	20.33	7.1	51.41	5.18	5.93	2.94	4.08	37.91	36.07	34.99	34.52	37.07	107.46	102.99	101.84	99	91.84
BMW 2230	1.97	0.65	27.65	37.88	32.18	20.08	69.87	2.98	2.55	3.21	4.9	33.72	34.88	34	34.03	36.82	99.45	92.74	100.55	88.32	85.36
BMW 2231	1.57	2.39	65.35	64.72	20.59	15.06	32.9	3.96	6.93	6.17	5.91	32.86	35.62	36.01	33.55	34.87	107.08	104.28	105.59	104.5	89.58
BMW 2232	1.5	1.37	34.35	15.92	30.86	8	51.41	5.79	4.95	5.94	7.73	35.58	36.22	36	34.03	37.07	103.5	102.07	107.05	94.74	89.34
BMW 2233	3.04	5.84	39.62	11.5	34.37	21.91	37.09	9.09	5.2	4.05	5.25	35.02	37.4	37.45	36.96	36.9	108.52	97.35	112.2	101.17	89.16
BMW 2234	0.93	3.45	42.75	34.15	26.52	19.01	49.59	8.93	8.05	6.01	5.92	31.08	33.09	33	32.49	31.91	103.01	101.31	105.85	97.14	82.45
BMW 2236	0.98	1.97	47.67	53.55	33.74	27.81	51.92	5.11	3.2	3.91	4.13	29.84	30.7	31.54	31.44	29.85	104.9	98.06	95.58	92.14	81.65
BMW 2237	1.03	0.72	52.17	58.87	26.41	27.14	64.53	5.63	4.16	5.92	2.81	31	32.2	32.54	33.05	34.84	90.66	86.73	92.78	87.71	75.05
BMW 2238	1.15	2.16	27.53	21.25	35.65	46.41	67.36	2.11	3.01	4.56	6.07	34.1	34.22	33.52	33.48	37.05	104.86	103.88	104.51	94.33	77.57
BMW 2239	6.35	5.41	35.04	33.42	30.66	29.67	56.92	7.15	4.91	6.91	7.08	36.86	38.47	39.52	36.03	36.85	85.59	76.2	82.12	76.53	71.15
BMW 2240	1.05	2.21	60.1	65.16	19.9	22.14	60.43	3.16	2.96	4.68	4.04	30.24	31.42	31.08	31.01	30.55	91.11	86.5	91.65	88.26	78.41
BMW 2241	1.57	1.97	39.41	33.54	40.03	24	49.53	7.94	6.9	2.92	7.11	32.05	32.08	32.93	32.48	32.84	94.95	85.92	88.18	80.91	78.05
BMW 2242	1.96	1.48	44.35	12.55	23.83	16.23	66.92	6.13	7	1.91	3.91	33.64	36.12	37.55	34.02	36.85	115.58	109.8	114.36	109.76	91.01
BMW 2243	0.87	2.76	30.54	19.52	28.5	29.04	39.81	6.22	5.07	2.72	5.97	32.38	32.35	33.02	33	37.04	108.02	106.01	111.83	102.11	93.53
BMW 2244	3.02	9.04	34.87	26.38	27.67	40.87	51.08	7.07	6.22	4.5	5.01	34.21	35.69	33.99	33.43	37.06	96.15	86.75	91.85	84.91	70.63
BMW 2245	1.86	2.4	27.19	17.74	33.8	22.14	63.88	5.82	4.99	6.95	3.95	31.65	34.62	34.43	33	36.79	113.53	103.56	105.21	100.29	90.42
BMW 2246	0.95	0.91	53.88	27.77	33.49	44.9	66.11	4.86	4.07	6.79	6.85	30.18	32.47	32.41	32.99	34.88	107.21	101.45	102.25	95.98	86.22
BMW 2247	1.59	7.59	35.48	30.73	43.43	50.88	58.88	2.92	3.84	6.95	5.01	31.39	32.33	32.94	32.94	32.79	101.88	90.88	96.2	88.43	83.42
BMW 2248	3.91	8.45	38.33	24.15	42.66	64.67	81.92	3.74	4.74	2.91	5.92	37.16	39.58	39.5	36.03	42.85	104.92	107.26	109.85	104.53	82.15
BMW 2249	4.15	5.79	77.98	36.84	39.45	33.83	67.36	2.96	4.95	6.56	4.89	36.12	36.34	34.85	35.49	37.05	104.53	106.49	105.86	99.62	82.07
BMW 2250	1.21	3.17	37.16	41.85	34.75	20.9	49.53	4.97	6.11	6.92	7.13	34.15	35.24	34.48	34.47	35.84	87.69	86.74	93.89	82.14	77.05
BMW 2251	1.3	2.93	47.84	13.2	25.9	9.11	44.53	9.1	4.93	2.92	5.87	35.48	36.88	38.07	34.98	36.84	104.86	108.39	107.15	104.37	93.05
BMW 2252	1.02	1.19	49.9	29.88	13.69	11.73	41.11	3.05	4	2.79	5.08	35.42	36.53	38.45	34.98	36.88	96.86	95.68	97.85	97.16	84.22
BMW 2255	2.89	0.94	39.41	24.12	34.79	23.42	68.88	4.13	3.1	2.95	5.98	35.05	36.04	36.39	33.47	36.79	98.24	95.2	98.26	92.47	76.42
BMW 2256	2.02	6.7	71.6	36.58	54.89	19.46	52.36	3.05	4.05	3.56	5.01	32.83	35.03	34.47	33.52	35.05	105.89	96.03	98.93	94.66	93.07
BMW 2257	4.29	6.67	90.5	67.42	29.03	18.37	65.43	6.26	6.99	5.68	6.91	34.98	36.52	34.49	34.05	37.05	105.84	98.74	103.14	100.19	84.41
BMW 2258	1.14	1.42	23.48	15.74	19.92	9.4	41.92	3.01	5.93	6.91	2.95	33	36.92	34.5	36.01	34.85	105.43	97.58	98.12	96.17	88.15
BMW 2261	0.89	2.14	49.35	18.11	17.35	43.21	69.53	6.79	5.94	6.92	7.98	33.58	36.48	34.91	34.46	36.84	84.5	81.75	85.13	79.64	72.05
BMW 2262	3.04	3.1	31.34	19.15	37.35	31.75	66.08	1.87	2.94	2.5	4.14	32.48	31.98	32.64	31.99	33.06	112.45	103.75	104.26	101.45	90.13
BMW 2263	1.04	0.99	32.39	32.69	29.26	17.5	51.08	7.23	4.77	5.5	4.93	31.77	32.5	33.04	33.48	37.06	116.32	108.61	105.85	101.43	92.13
BMW 2264	0.98	2.71	32.04	19.16	32.85	11.86	33.88	4.07	4.89	2.95	4.04	38.21	38.1	39.08	37.06	38.79	114.59	105.45	113.65	104.1	92.42
BMW 2265	1.05	2.35	30.94	17.82	48.2	38.33	74.81	2.94	3.02	2.72	5.85	32.71	33.05	34	32.95	33.04	97.95	92.73	103.8	100.95	81.53
BMW 2266	1.32	0.89	43.44	15.72	41.88	17.22	47.36	4	3.35	7.56	8.91	35.88	36.17	35.01	34.96	38.05	99.29	96.65	105.59	96.76	86.07
BMW 2267	1.7	0.87	9.78	7.28	29.26	6.53	50.07	4.98	5.77	5.84	5.14	38.3	40.5	40.55	37.43	40.94	103.45	100.61	105.75	99.58	84.05
BMW 2268	2.9	1.72	28.6	15.69	26.22	29.78	70.07	1.71	4.04	5.84	5.99	32.03	32.08	34.47	32.58	36.94	83.36	75.42	85.95	73.34	65.05
BMW 2269	2	1.5	58.27	63.4	32.66	17.01	61.08	6.96	5.74	6.5	6.81	33.87	36.08	33.45	34.05	37.06	90.65	90.26	98.28	95.09	80.13
BMW 2270	3.98	1.64	32.34	23.56	41.35	14.07	47.36	4.03	2.95	4.56	5.03	32.03	34.75	33.92	33.98	37.05	101.48	103.37	102.43	97.31	86.07
BMW 2271	2.07	3.27	45.77	55.43	30.08	15.95	62.36	3.09	2.94	4.56	3.04	34.04	34.54	34.69	33.54	35.05	82.14	76.3	78.07	76.44	65.57
BMW 2272	3.05	4.9	76.36	15.16	56.97	33.93	56.08	5.87	3.92	4.5	3.94	32.72	32.6	32.98	32.56	35.06	109.38	103.18	102.94	102.12	93.13
BMW 2274	4.79	8.57	88.27	42.92	25.62	25.49	61.08	2.96	4.8	3.5	4.95	35.37	36.9	36.05	34.99	37.06	101.65	97.98	98.33	89.1	81.63
BMW 2275	1.3	1.69	49.13	20.88	65.58	35.68	78.61	6.84	4.88	2.75	5.08	31.09	32.8	32.45	32.56	34.89	107.32	96.92	105.85	96.52	83.01
BMW 2276	1.01	6.59	58.53	10.23	44.89	29.65	56.11	5.17	4.01	3.79	5.01	31.58	32.94	33.44	33.01	32.88	106.86	101.15	104.7	103.97	89.72
BMW 2277	0.84	8.05	81.37	50.8	34.26	20.53	67.36	7.01	5.12	6.56	5.95	31.53	32.84	33.06	34.02	37.05	110.89	103.86	108.83	99.28	86.57
BMW 2278	1.27	1.83	47	31.53	28.13	40.42	57.36	3.89	2.93	5.56	6.05	31.02	31.43	32.49	31.55	33.05	91.24	90.12	94.92	92.33	82.07
BMW 2279	0.99	2.67	86.1	67.42	64.54	71.95	58.61	4.04	4.1	2.75	6.91	31.9	33.24	33.49	33.02	37.89	105.96	101.5	107.64	104.63	90.01
BMW 2280	1.15	1.37	32.51	24.18	35.17	42.76	63.88	4	5.22	5.95	3.96	34.33	35.19	35.54	34.06	36.79	93.9	93.75	98.63	93.31	82.92
BMW 2281	1.03	1.88	47.39	11.34	34.43	21.06	64.53	7.23	6.93	4.92	7.11	32.27	37.17	34.47	33.54	36.84	117.82	111.16	114.32	109.77	97.05
BMW 2282	0.99	3.45	74.11	75.52	53.5	68.86	62.36	6.86	4.07	6.56	7.18	31.12	31.35	32.07	31.02	37.05	101.9	93.01	103.12	95.37	83.57
BMW 2283	1.82	3.87	37.16	14.9	22.3	10.57	76.92	3.11	3.13	6.91	6.16	32.95	34.7	34.93	34.06	36.85	99.76	98	97.31	94.74	85.15
BMW 2284	1.08	0.82	32.11	17.71	42.3	16.52	58.88	6.8	5.92	4.95	5.8	36.03	36.78	35.52	34.99	36.79	100.08	92.01	104.37	97.79	82.42
BMW 2285	1.14	2.55	30.84	16.47	38.99	18.92	58.61	5.1	5.15	6.75	7.04	31.71	33.04	34.1	33.98	36.89	99.63	98.87	101.57	91.36	84.51
BMW 2286	1.09	5.19	47.04	46.55	36.4	33.29	61.11	5.07	4.9	3.79	7.03	34.71	35.06	34.11	33.94	34.88	105.09	101.25	101.72	94.43	86.22
BMW 2287	1.93	0.31	37.66	15.49	42.97	43.73	66.08	3.09	3.09	4.5	3.9	30.97	32.43	34.09	33.51	33.06	98.23	93.61	96.56	95.68	86.13
BMW 2288	1.12	0.64	23.88	4.39	24.99	16.68	52.02	8	6.86	7.69	8.07	31.99	32.62	32.98	33.56	33.04	110.28	107.85	109.32	100.52	97.79
BMW 2289	3.98	3.41	37.84	43.42	27.68	15.75	58.96	5.1	4.91	3.58	6.08	30.98	32.06	33.02	32.92	30.04	86.86	85.79	90.62	83.86	81.46
BMW 2290	3.12	3.67	44.9	16.18	22.5	23.07	62.67	5.79	4.03	6.51	8.75	32.07	34.2	32.99	32.05	35.05	82.77	74.01	77.85	72.69	66.02
BMW 2291	2.9	0.94	65.79	66.62	30.46	44.55	76.41	2.9	0.99	3.73	2.98	33.55	36.59	36.39	33.97	37.04	104.68	100.15	104.76	98.56	85.91
BMW 2292	0.91	0.92	31.14	18.87	63.55	37.98	76.41	2.9	3.22	4.73	2.95	31.96	32.53	34.48	33	33.04	103.9	102	107.63	99.49	91.91
BMW 2293	0.94	2.58	27.19	34.89	37.95	57.5	81.12	3.97	4.08	6.93	5	30.59	31.72	32.91	30.98	34.83	94.12	92.59	97.85	89.93	78.43
BMW 2294	1.05	2.06	44.89	44.9	12.31	8.67	50.48	5.23	5.24	4.96	6.19	31.27	35.09	33.93	33.08	36.79	97.32	91.34	93.85	85.03	76.31
BMW 2295	1.04	1.48	43.21	17.55	24.02	22.35	55.48	3.09	5.07	2.96	6.91	32.46	32.94	33.05	33.51	34.79	98	101.09	103.36	97.91	84.31
BMW 2296	2.02	1.43	21.78	10.7	20.99	15.05	53.51	2.95	4.06	4.92	4.87	32.46	36.38	34.57	34.04	36.84	93.8	88.6	93.65	86.64	77.03
BMW 2297	1.88	1.97	81.72	69.65	17.23	28.8	68.96	4.72	4.74	4.58	6.92	30.13	32.03	31.06	31.54	32.96	94.03	83.06	92.26	84.68	66.96
BMW 2299	1.98	4.19	54.2	15.68	26	38.92	58.96	7.91	6.07	8.58	8.21	32.28	35.35	34.06	32.95	37.04	112.41	101.01	109.43	103.71	86.46
BMW 2300	1.01	1.72	25.79	26.65	22.99	21.37	60.2	7.9	6.22	4.77	8.98	30.55	31.3	32	32.56	31.88	82.68	79.4	85.1	76.62	67.4
BMW 2302	2.97	6.1	54.22	31.62	40.84	13.79	65.48	6.72	5.02	4.96	7.08	37.63	36.63	34.96	35.91	36.79	105.03	98.08	95.53	92.14	82.81
BMW 2304	4.49	4.77	28.86	23.52	42.47	56.86	72.7	3.87	3.02	4.8	5.12	31.22	32.69	33.02	32.5	32.88	86.88	84.86	86.7	78.7	72.61
BMW 2305	1.44	6.61	53.27	53.77	25.15	48.23	73.51	2.96	5.07	3.92	7.02	32.37	35.45	32.37	32.52	36.84	85.15	76.04	83.41	76.48	68.53
BMW 2306	5.76	8.48	98.53	59.23	31.46	39.96	91.67	6.17	5.99	6.86	6.15	30.08	31.55	31.39	31.01	30.43	92.36	92.38	94.42	93.42	83.44
BMW 2307	0.86	6.41	90.2	45.22	29.09	71.75	85.48	1.9	2.89	3.96	4.91	32.04	32.97	34.07	32.92	36.79	79.95	78.46	76.01	73.86	63.81
BMW 2309	1.44	5.55	38.99	13.02	31.41	26.17	72.02	7.82	6.93	7.69	9.15	33.32	33.62	34.01	33.52	37.04	99.74	94.07	95.92	87.09	76.79
BMW 2310	2.95	4.92	40.36	15.62	33.24	23.86	66.41	5.7	5.92	2.73	5.84	34.37	34.02	34.96	33.52	37.04	104.23	95.35	103.43	98.37	80.78
BMW 2311	0.97	1.43	64.41	49.37	26.01	36.41	75.48	4.13	5.22	4.96	5.13	30.55	31.72	31.49	31.98	30.79	106.24	101.16	102.54	98.33	87.81
BMW 2312	1.53	4.6	54.76	65.75	29.71	52.25	65.48	8.84	5.07	7.96	6.14	31.19	32.78	33.14	33.01	34.79	102	94.62	106.76	93.09	89.81
BMW 2314	4.73	8.79	48.19	19.34	43.59	28.69	51.41	5.18	6	5.73	5.89	33.99	37.71	35.35	33.48	37.04	113.4	105.8	116.86	104.57	100.91
BMW 2315	1.16	5.81	32.34	15.46	21.93	14.14	50.2	3.15	3.93	6.77	4.92	32.36	34.67	35.08	33.5	36.88	86.32	90.66	89.18	91.35	73.4
BMW 2320	1.43	7.66	72.84	13.6	16.79	20.2	58.96	4.1	3.92	6.58	5.81	32.48	36.22	37.43	33.91	37.04	98.36	95.32	94.86	90.14	85.46
BMW 2321	1.11	1.29	75.13	66.12	22.19	29.54	66.12	4.12	4.2	5.93	6.05	33.46	34.17	33.44	32.99	34.83	85.81	83.65	88.65	86.76	78.93
BMW 2322	2.23	2.1	20.42	5.12	28.57	16.35	47.02	1.87	3.04	3.69	7.08	38.43	41.27	39.96	36.97	39.04	108.11	104.41	109.53	110.51	93.79
BMW 2323	1.04	1.21	59.86	NA	52.23	NA	96.67	3.09	4.2	5.86	6.12	30.54	30.59	30.87	30.98	31.93	91.35	92.47	94.96	87.1	72.44
BMW 2324	1.11	0.55	81.91	53.3	22.65	36.52	77.67	4.13	3.31	5.51	6.95	30.55	32.04	31.06	31.99	33.05	97.24	90.48	92.83	87.79	81.02
BMW 2325	0.95	2.96	21.85	8.47	18.14	8.3	30.48	5.13	7.07	3.96	8.01	32.14	35.69	33.99	33.5	36.79	113.58	110.33	110.79	103.36	90.31
BMW 2326	0.99	1.33	45.64	13.03	47.06	18.42	56.41	2.02	2.87	2.73	2.05	36.64	36.69	34.49	34.55	37.04	104.75	92.4	101.92	98.33	78.41
BMW 2327	0.8	0.87	47.54	51.68	27.07	18.39	43.51	4.19	6.11	3.92	3.96	34.01	36.09	33.54	32.95	34.84	98.65	101.68	103.13	101.17	92.03
BMW 2328	3.35	3.04	47.11	14.5	12.27	5.95	46.67	3.8	5.88	3.86	6.98	37.53	36.87	36.03	34.54	36.93	102.58	93.38	101.54	97.44	78.94
BMW 2329	1	2.69	38.26	21.09	40.93	22.72	62.7	2.85	1.84	2.8	2.13	35.95	36.83	36.11	34.04	36.88	101.54	99.38	101.34	98.75	81.11
BMW 2330	0.92	1.37	41.64	53.42	21.76	22.85	57.02	4.04	3.09	4.69	5.73	32.04	33	32.5	32.54	35.04	100.65	96.16	97.05	93.26	78.79
BMW 2331	2.93	2.54	50.45	17.2	52.03	19.37	53.96	4.91	7	4.58	8.9	33.6	35.46	34.08	33.99	37.04	103.56	95.75	105.52	94.63	71.96
BMW 2332	0.94	1.69	76.85	18.29	33.28	22.49	46.12	4.21	3.93	4.93	3.08	31.19	32.91	33.49	32.49	36.83	113.91	110.27	110.34	103.45	87.93
BMW 2333	3.86	6.88	43.77	21.45	26.22	13.92	51.41	3.9	4.88	7.73	7.06	33.06	36.3	33.98	33.05	35.04	112.19	103.85	107.2	102.33	90.41
BMW 2334	1.24	2.75	29.38	14.52	60.52	18.42	43.96	5.15	4.83	5.58	5.1	33.87	36.02	33.92	33.97	37.04	105.44	95.69	103.31	95.97	83.46
BMW 2336	1.12	4.4	25.96	4.93	17.47	7.28	33.96	3.06	2.72	6.58	7	35.64	39.57	36.93	35.97	37.04	95.03	98.21	104.62	103.28	82.96
BMW 2337	3.06	1.74	29.77	18.7	35.05	15.42	56.41	3.85	3.87	4.73	6.98	32.4	35.87	36.43	34.07	37.04	99.18	96.13	99.3	98.28	85.91
BMW 2338	2.14	5.01	41.93	47.17	16.76	21.48	51.41	7.95	5.09	5.73	6.12	37.4	38	37.46	36	37.04	90.36	81.16	93.16	81.99	67.91
BMW 2340	2.81	4.19	43.98	14.52	35.18	18.78	53.96	5.24	6.87	6.58	5.77	34.77	37.34	36.02	34.08	37.04	96.53	93.85	104.7	91.16	82.46
BMW 2342	6.95	7.66	63.79	51.25	23.57	21.8	58.96	9.24	7.98	4.58	8.07	33.65	33.34	34.02	33.01	35.04	89.64	83.72	89.01	84.94	75.96
BMW 2344	1.74	1.61	38.73	22.19	23.32	32.11	58.96	4.95	5.95	6.58	7.84	33.97	36.65	34.37	33.5	38.04	78.03	77.73	76.21	75.54	58.96
BMW 2347	1.07	1.86	27.19	10.69	29.03	18.73	48.51	5.98	4.73	5.92	5	36.45	36.56	36.05	34.46	34.84	109.73	110.45	107.44	104.36	91.03
BMW 2348	5.31	7.12	66.16	31.59	28.49	45.57	75.48	3.12	4.07	8.96	5.93	30.94	32.97	31.61	31.98	36.79	107.48	96.95	103.71	95.75	88.84
BMW 2350	0.87	1.1	40.79	13.75	23.69	11.12	32.46	3.76	4.14	5.94	6.14	36.95	37.76	37.64	35.93	37.04	113.16	103.24	107.76	106.08	96.4
BMW 2351	0.93	4.06	49.2	25.94	39.64	17.75	57.46	4.01	3.73	5.94	4.94	35.72	37.16	36.08	34.51	37.04	106.12	100.58	107.05	98.1	84.9
BMW 2352	4.45	6.71	35.34	20.92	38.66	23.44	63.11	3.1	2.94	5.76	5.05	36.98	37.09	37.99	34.04	37.05	99.86	92.84	97.28	95.71	75.62
BMW 2353	1.9	1.43	63.19	25.71	25.98	15.4	36.56	3.18	4.88	6.18	8.04	37.49	38.73	38.53	37.06	36.83	114.4	110.81	112.74	106.53	97.54
BMW 2354	3.41	4.11	38.05	22.7	30.43	16.57	48.95	4.93	4.98	5.17	7.1	32.99	37.07	35.58	32.96	36.84	111.75	106.49	103.65	103.26	90.64
BMW 2355	3.05	0.99	37.75	10.53	31.34	19.01	50.64	3.12	2.99	6.02	4.95	36.94	38.93	37.45	34.99	37.88	94.19	93.4	100.91	99.64	84.01
BMW 2356	1.44	3.04	65.73	30.48	28.32	10.46	48.14	4	5.15	3.05	5.14	34.85	36.48	35.03	34.95	36.87	106.08	101.74	106.33	96.75	89.21
BMW 2358	4.46	4.83	30.02	18.03	31.85	13.29	60.64	4	4.08	7.02	6.05	37.38	38.09	37.99	34.94	36.88	97	85.98	99.92	94.43	81.01
BMW 2360	1.01	1.13	29.33	48.76	35.77	45.23	72.46	4.08	4.08	4.94	4.91	30.58	32.54	32.14	32.02	32.04	92.46	82.93	90.27	85.76	69.4
BMW 2361	2.91	1.66	28.44	5.6	21.95	19.88	43.14	5.94	7	7.05	6.81	34.71	38.15	35.93	33.51	36.87	105.45	104.52	104.86	103.21	86.21
BMW 2362	4.53	4.56	19.66	13.9	37.82	24.7	63.14	3.11	6.02	5.05	4.19	30.95	32.31	32.93	33.03	36.87	94.76	90.75	96.85	97.43	80.21
BMW 2363	1.08	2.12	33.84	10.2	27.83	11.76	57.1	3.87	2.96	7.11	5.08	38.43	39.33	38.62	36.93	37.93	94.9	96.64	100.44	96.08	83.54
BMW 2364	4.6	2.07	29.94	10.87	14.58	7.51	43.14	3.93	3.94	7.05	9.06	37.25	38.17	37.44	35.99	37.87	100.2	98.26	101.66	98.66	87.21
BMW 2365	2.11	1.39	19.9	16.72	30.18	17.64	58.11	8.05	6.87	4.76	7.91	38.42	37.84	37.51	35.05	37.05	100.86	101.85	105.59	99.21	86.62
BMW 2366	2.13	6.15	65.03	56	24.45	17.32	53.95	6.82	5	4.17	5.98	36.68	37.27	38.47	34.5	36.84	91.02	82.18	86.44	84.6	72.64
BMW 2367	0.95	3.93	28.66	11.1	55.13	33.06	58.11	5.12	5.12	7.76	6.94	30.94	31.61	31.96	31.05	30.55	101.98	97.13	97.65	94.5	85.12
BMW 2368	2.57	4.91	42.73	22.72	19.89	12.09	50.64	6.04	5.01	5.02	5.91	37.55	38.94	37.57	37.03	36.88	99.38	92.65	103.01	99.85	83.01
BMW 2369	0.85	1.38	19.62	9.13	25.63	21.08	48.14	4.09	5.11	7.05	8.64	30.83	32.08	31.43	31.53	30.87	90.55	88.49	94.36	87.82	79.21
BMW 2372	1	2.48	39.4	21.73	43.59	24.59	55.91	6.81	5.94	6.21	6.15	33.89	35.78	33.89	33.99	36.79	99.45	96.61	105.42	104.29	86.92
BMW 2373	1.39	5.47	27.17	22.15	20.68	14.01	61.84	8.63	6.88	4.98	5.92	36	36	35.06	34.5	37.04	102.16	93.58	97.76	89.6	73.52
BMW 2376	1.07	1.11	29.13	5.69	33.86	27.7	70.91	6.84	6	7.21	8.84	31.09	32.43	32.87	32.95	34.79	101.32	90.63	97.21	88.02	77.42
BMW 2377	2.14	1.98	34.35	9.52	28.96	12.8	43.14	4.13	2.99	7.05	3.95	37.14	37.08	38.51	37.52	36.87	99.58	94.97	100.29	99.21	91.21
BMW 2378	0.95	1.01	47.69	28.25	22.23	15.8	36.84	3.05	4.03	4.98	3.14	34.01	33.72	34.07	32.97	35.04	110.93	103.98	111.89	101.99	96.02
BMW 2384	2.08	5.04	58.52	20.38	31.55	10.18	46.56	6.03	3.06	4.18	4.01	36.01	37.6	39.49	37.01	36.83	108.24	100.46	105.35	105.52	95.04
BMW 2386	1.91	2.97	47.74	20.98	44.49	34.16	65.64	2.23	3.01	3.02	0.94	32.93	35.06	35.52	33.04	36.88	100.47	94.2	101.7	94.95	84.01
BMW 2387	1.09	3.12	66.52	54.12	30.29	32.91	52.46	8.81	5.08	6.94	5.05	31.02	32.65	33.01	33.47	37.04	105.5	97.16	104.21	99.01	89.9
BMW 2388	3.97	6.2	66.39	53.32	11.51	14.53	54.39	5.25	5.12	3.83	6.96	35.51	37.45	34.47	34.02	37.04	76.1	70.35	81.25	76.28	62.56
BMW 2392	1.46	2.19	44.61	17.18	47.63	16.87	55.91	7.89	6.01	8.21	9.21	35.36	37.48	38.06	36.01	36.79	105.21	98.61	106.43	100.7	88.92
BMW 2393	1.12	0.97	35.76	19.55	43.66	20.46	61.56	2.85	6.99	5.18	5.13	30.45	32.02	32.54	32.45	31.33	108.54	105.03	106.58	99.25	84.54
BMW 2394	0.99	2.37	73.33	28.42	44.56	35.03	65.64	6.1	5.88	7.02	6.73	33.21	35.35	36	34.43	36.88	112.63	103.8	108.55	104.58	94.51
BMW 2395	1.42	7.8	87.61	67.08	25.33	29.3	63.14	9.03	7.93	9.05	8.11	30.51	32.07	31.41	30.98	30.87	98.46	85.49	93.78	87.59	79.71
BMW 2396	1.29	6.29	37.16	20.12	26.3	19.9	80.91	3.97	6.99	6.21	6.05	34.15	36.62	35.44	33.99	36.79	96.19	91.56	100.65	100	80.42
BMW 2397	0.91	6.15	78.45	77.67	39.46	38.71	73.95	9.39	7.01	2.17	8.04	32.7	36.25	33.4	33.99	36.84	84.1	83.87	86.78	81.11	61.64
BMW 2398	1.91	2.64	67.72	45.82	57.23	30.22	55.64	4.75	5.2	4.02	7.03	32.03	34.59	35.49	33.54	36.88	113.95	108.47	110.39	104.68	93.01
BMW 2399	1.99	5.35	93.85	77.92	14.75	23.26	65.91	8.21	5.1	7.21	8.98	32.51	33.12	33.93	33.01	36.79	105.36	100.87	103.4	97.28	87.92
BMW 2401	0.88	4.46	46.91	62.1	51.09	66.86	91.84	5.13	4.05	4.98	4.95	31.05	33.29	33.61	33	37.04	88.24	84.56	91.46	88.67	69.52
BMW 2402	1.04	1.29	36.66	21.12	30.36	25.26	57.46	8.14	5.97	8.94	8.05	30.84	33.47	32.44	32.44	33.04	106.1	99.1	103.65	96.23	88.4
BMW 2406	0.75	0.6	68.77	43.25	56.13	21.97	63.11	5.9	6.06	7.76	6.14	30.06	29.87	30.64	31.03	29.05	105.19	102.55	105.26	101.65	90.12
BMW 2409	0.99	1.61	54.34	19.2	31.05	22.5	54.39	5.74	5.84	5.83	6.1	32.2	31.68	33.08	33.03	37.04	103.36	104.05	112.65	102.09	83.06
BMW 2410	1.12	3.22	29.57	18.62	30.46	6.3	62.46	2.75	3.99	5.94	7.02	37.43	37.57	36.45	34.93	37.04	93.58	89.73	97.51	93.41	81.4
BMW 2413	1.02	5.58	48.04	22.39	39.69	16.9	58.14	9.22	6.94	5.05	8	35.88	37.14	37.41	36.06	36.87	93.02	85.42	93.35	93.03	73.71
BMW 2414	1.99	6.9	76.17	56.83	44.03	36.32	56.56	5.78	5.73	4.18	4.94	30.72	33.06	31.5	31.99	34.83	113.95	108.95	115.04	101.38	89.04
BMW 2417	1.15	1.3	33.6	27.08	48.4	16.51	61.84	4.04	4.08	3.98	7.11	36.4	35.24	34.41	34.05	38.04	82.96	79.29	86.78	83.09	65.02
BMW 2418	4.11	8.45	44.1	74.66	60.93	50.84	101.84	7.05	6.9	7.98	6.99	31.33	33.47	32.56	33.05	35.04	92.89	88.95	93.96	84.35	68.02
BMW 2419	1.1	1.72	29.07	9.15	35.71	11.27	47.1	7.03	5.15	9.11	8.98	32.99	33.08	34.5	33.02	37.93	107.51	112.86	105.1	104.34	93.54
BMW 2421	1.02	4.06	49.09	27.75	29.69	14.51	58.95	7.84	5.94	6.17	5.91	31.01	32.64	33.01	33.02	31.84	107.55	102.92	105.72	101.68	90.64
BMW 2422	4.16	6.61	82.52	22.66	29.64	21.7	52.46	3.77	2.73	3.94	7.12	34.01	36.16	34.95	35.03	37.04	108.9	102.58	110.32	97.43	90.9
BMW 2423	2.09	2.95	24.87	29.15	41	29.16	56.53	6.07	3.08	7.23	4.92	33.21	33.95	33	33.04	36.99	95.15	91.86	92.85	88.95	80.17
BMW 2424	3	3.44	45.84	16.16	38.08	26.18	57.43	7.1	4.88	6.99	7.09	35.21	34.3	35.47	34.01	37.2	107.13	104.42	111.62	106.35	91.52
BMW 2425	5.08	7.69	57.6	74.98	48.82	49.5	54.36	5.16	5.99	3.88	4.1	36.74	38.02	36.94	34.53	37.2	110.11	103.45	106.27	100.74	89.19
BMW 2426	1.05	1.04	24.66	15.92	12.93	31.85	58.08	5.11	4.01	4.81	7.92	30.95	32.68	32.67	33.05	35.21	78.26	71.51	77.19	74.44	60.25
BMW 2427	1.82	2.5	56.56	43.4	37.54	22.06	72.08	6.13	5.06	7.16	8.81	37.98	36.37	34.45	33.99	37.09	94.15	89.49	92.78	87.78	79.67
BMW 2428	6.08	8.19	72.11	59.88	56.71	51.5	83.11	6.04	7.16	8.1	7.08	30.66	31.68	33.45	32.48	33.04	104.78	105.92	105.85	101	83.84
BMW 2429	0.91	8.45	50.48	13.16	14.44	12.73	53.11	2.96	4.05	4.1	4.99	37.12	39.31	41.06	35.98	38.04	109.53	102.98	102.96	97.26	89.34
BMW 2430	3.06	7.27	44.7	61.85	46.04	60.11	70.88	5.93	7.09	5.26	5.01	33.09	35.5	34.08	33.04	34.95	101.74	97.36	97.85	96.37	87.04
BMW 2432	1.99	7.38	68.87	47.95	32.19	33.36	70.61	6.05	6.13	6.06	7.06	29.41	31.07	31.48	31.06	30.04	100.27	90.78	99.7	92.6	82.63
BMW 2435	0.95	1.5	48.88	14.9	31.17	9.76	37.08	4.86	4.99	3.16	6.81	37.18	38.55	36.45	37.48	37.09	104.71	102.32	108.28	102.45	88.17
BMW 2437	1.49	1.92	33	12.24	27.44	16.89	60.88	3.26	4.12	4.26	4.95	33.26	34.64	34.5	33.47	34.95	114.11	104.92	104.62	101.59	95.04
BMW 2438	1.99	4.4	50.73	18.05	24.57	7.89	56.81	7.03	8.08	4.03	6.93	30.11	31.73	33.54	31.58	35.2	110.92	111.23	111.45	102.9	88.15
BMW 2439	1.54	2.72	67.95	11.12	28.73	19.73	57.43	3.91	4.96	5.99	6.02	31.6	32.99	32.45	32.51	35.2	109.56	110.9	107.01	100.22	97.52
BMW 2440	2.01	2.69	29.8	35.68	41.53	18.9	68.08	6.92	5.99	8.81	9.21	31.98	35.16	32.06	33.04	35.21	93.98	92.62	96.43	88.96	84.75
BMW 2441	0.92	1.97	15.14	9.19	42.59	19.01	56.81	9.04	6.16	8.03	8.92	36.54	36.38	36.92	34	37.2	99.65	97.45	103.1	94.1	83.15
BMW 2442	1.54	5.81	83.63	46.99	29.46	42.44	60.61	4.79	4.87	5.06	7.9	30.52	31.78	31.09	31.04	32.04	111.69	105.11	112.06	100.62	96.63
BMW 2443	0.76	3.02	26.1	21.99	46.05	31.17	77.08	8.16	4.84	8.16	7.31	28.08	29.68	31	31.02	31.59	101.27	97.05	101.61	97.09	83.67
BMW 2444	5.47	1.9	77.4	62.05	31.7	27.3	56.53	4.38	5.86	4.23	6.94	33.98	35.82	34.98	33.04	36.99	112.43	105.35	112.44	102.18	93.17
BMW 2445	1.84	6.41	32.69	35.27	24.58	26.12	73.11	4.05	3.94	3.1	4.85	32.51	33.17	33.41	32.54	33.04	105.43	92.76	99.75	94.52	88.84
BMW 2446	0.94	5.83	64.69	38.41	47.02	44.4	89.36	5.16	4.84	3.88	7.11	31.21	36.01	33	33.48	37.2	100.61	94.99	104.16	96.98	85.19
BMW 2447	4.57	6.74	56.56	35.82	42.71	35.25	53.92	6.78	4.93	4.22	2.77	31.83	35.23	34.49	34.47	37	119.42	104.58	108.67	101.53	94.76
BMW 2448	1.06	2.53	34.82	52.57	31.76	51.98	88.92	5.03	5.96	8.22	8.02	36.8	34.13	34.41	33.96	37	91.9	88.03	91.54	82.76	74.26
BMW 2449	1.01	2.43	77.19	29.37	32.71	14.04	51.81	6.27	6.93	7.03	9.13	37.15	33.73	33.49	33.99	37.2	109.32	105.58	109.54	99.26	87.65
BMW 2451	2.92	4.58	39.54	71.52	32.63	36.56	68.11	4.07	3.16	4.1	5.91	31.71	33.29	33.47	32.9	35.04	111.09	99.27	107.92	100.84	92.34
BMW 2452	1.15	5.89	20.76	11.39	38.37	13.53	63.08	2.83	2.89	2.81	2.99	36.4	38.47	37.45	35.02	37.21	104.69	102.47	109.53	103.28	90.75
BMW 2453	1.56	7.6	30.5	14.4	41.46	46.88	74.36	3.26	3.05	3.88	3.99	36.26	38.07	36.48	37.03	37.2	78.59	78.77	77.77	75.06	70.69
BMW 2454	0.87	3.14	49.61	65.89	53.43	77.91	93.92	2.91	4.03	6.22	5.03	32.47	33.18	32.99	32.46	35	96.79	93.49	95.39	94.16	79.26
BMW 2455	2.05	1	54.69	32.57	26.05	12.53	48.08	8.98	7.84	7.81	8.95	36.95	38.68	36.93	36.43	37.21	105.73	98.05	101.99	96.08	91.75
BMW 2456	2.49	6.3	65.79	34.43	53.96	59.07	72.43	6.9	3.99	6.99	8.03	30.55	34.55	32.49	32.03	33.2	94.68	95.88	96.32	88.12	71.52
BMW 2457	1.49	1.39	35.73	29.69	21.57	20.15	31.53	6	5.13	4.23	6.96	37.85	37.38	36.6	35.06	36.99	96.08	94.4	96.55	91.12	80.67
BMW 2458	0.96	1.47	53.87	54.65	28.69	61.92	70.61	7.01	5.14	9.06	7.92	30.01	34.26	33.06	32.46	33.04	96.39	89.74	91.76	84.65	74.13
BMW 2459	2.54	2.62	29.34	12.62	17.36	11.61	54.36	0.74	3.97	6.88	5.05	35.2	37.23	36.01	35.95	38.2	95.86	95.22	102.21	95.52	82.69
BMW 2461	0.83	2.12	47.98	33.78	30.08	18.25	56.53	5.96	5.94	4.23	6.02	31.12	31.54	31	31.06	33.99	99.53	94.3	100.3	93.28	87.67
BMW 2464	1.93	5.21	47.32	31.07	28.73	12.62	51.53	5.02	3.96	7.23	8.77	31.25	31.99	31.44	32.01	31.99	90.87	89.4	93.91	88.05	79.67
BMW 2465	2.14	4.46	34.83	15.11	16.03	17.87	55.88	4.27	5.13	6.26	7.95	33.91	35.72	35	34.47	36.95	101.61	91.97	101.35	97.72	83.04
BMW 2467	1.01	0.88	35.25	9.02	21.23	15.64	68.08	4.12	4.07	5.81	3.98	34.44	37.15	35.07	33.51	37.21	106.69	97.92	101.99	100.76	88.25
BMW 2468	0.91	0.94	49.77	25.12	22.63	44.3	88.92	5.85	3	6.22	6.98	32.4	37	33.89	33	37	84.68	74.2	85.76	84.36	70.76
BMW 2469	1.16	2.82	72.46	15.37	16.59	27.7	81.81	1.83	3.89	4.03	5.99	36.83	36.97	38.04	34.91	37.2	96.63	96.46	93.33	89.14	80.15
BMW 2470	1.47	3.79	68.79	73.95	55.71	47.66	68.11	6.24	5.04	3.1	6.92	31.65	30.74	31.52	33.01	33.04	112.14	106.97	104.77	100.34	91.34
BMW 2471	0.97	2.22	69.9	74.7	49.19	46.17	67.43	8.24	8.13	6.99	9.05	34.67	34.6	34.06	33.08	37.2	91.37	87.87	88.24	83.03	70.02
BMW 2472	0.87	1.96	69.78	33.58	27.98	37.01	71.81	2.98	4	3.03	4.03	36.3	36.59	34.52	34.04	33.2	85.45	77.88	84.22	77	68.15
BMW 2473	1.89	4.27	86.88	52.93	42.79	38.01	64.36	6.13	5.08	4.88	6.04	35.97	37.15	34.69	33.49	37.2	93.09	89.66	88.07	85.16	70.19
BMW 2474	2.82	2.2	45.24	18.5	44.45	25.18	70.61	5.83	6	5.06	3.99	36.64	37.65	36.56	35.51	37.04	97.3	95.02	95.62	90.52	78.63
BMW 2475	4.87	7.45	74.43	69.66	62.03	43.07	88.11	2.81	3.1	3.1	5.99	31.1	33.68	33.06	32.96	33.04	89.8	87.36	91.46	84.26	73.84
BMW 2476	1.98	2.43	83.32	66.87	36.93	56.27	87.43	3.76	3.93	6.99	8.13	31.12	31.67	31.99	31.03	29.7	84.17	73.16	80.04	76.86	71.02
BMW 2477	1.12	5.6	66.95	42.49	23.86	26.8	53.11	6	6.88	9.1	7.99	31.12	33.4	33.48	33	35.04	99.14	96	93.27	85.86	79.34
BMW 2478	5.72	5.92	37.13	12.24	74.49	15.12	50.88	8.76	3.88	4.26	5.95	37.46	36.53	36	34.93	37.95	109.94	100.57	113.62	105.08	84.04
BMW 2481	1.88	3.66	32.19	17.72	28.14	24.25	65.04	4.27	5.07	4.15	5.22	33.15	34.69	33.44	33.06	33.06	104.32	105.33	105.84	102.28	89.8
BMW 2483	1.12	0.97	38.23	21.69	47.27	25.12	71.97	4.03	4.23	5.04	2.92	35.1	33.67	35.42	33.04	37.05	104.42	93.02	96.1	88.02	77.47
BMW 2485	0.95	4.54	82.29	81.38	42.41	74.76	86.53	2.98	4.13	4.38	8.01	34.45	35.67	35.99	33.03	34.86	81.57	73.11	80.35	76.09	65.54
BMW 2489	0.88	4.31	70.04	21.99	24.08	22.25	50.69	5.15	7.01	6.97	7.9	36.86	38.08	37.59	35.06	37.07	97.09	93.67	95.56	91.28	82.53
BMW 2490	2.06	6.46	26.1	14.6	28.86	21.36	69.42	4.71	5.88	4.19	5.95	37.03	37.15	36.11	33.96	37.05	101.36	101.2	102.46	96.99	90.42
BMW 2492	1.04	1.22	71.17	31.69	29.64	30.26	58.22	4.88	2.73	3.22	3.99	33.16	34.66	33.47	33.44	36.9	88.66	81.08	89.45	86.73	73.91
BMW 2493	1.88	2.06	85.35	76.85	41.42	38.3	80.69	5.96	5.09	4.97	7.02	35.36	33.16	33.02	33.01	37.07	85.08	77.47	85.05	78.94	71.03
BMW 2494	3.11	7.24	31.88	14.7	42.62	22.95	71.53	2.95	3.06	5.38	4.98	37.85	37.93	36.93	35.04	37.86	94.19	84.88	94.3	87.44	77.04
BMW 2496	1.96	5.98	46.88	8.05	29.96	12.74	59.42	4.15	5.01	7.19	6.91	33.37	35.27	34.05	33.46	37.05	111.94	104.81	111.36	101.55	90.42
BMW 2497	2.11	3.42	37.46	16.25	27.82	17.16	54.68	4.83	4.79	3.32	5.08	37.83	37.3	36.09	33.97	38.95	92.63	91.19	96.84	96.2	77.45
BMW 2498	0.89	2.93	39.63	12.2	60.87	16.86	75.04	4.17	2.95	4.15	2.87	31.77	34.58	34.07	34	35.06	98.72	93.89	91.65	90.17	82.8
BMW 2503	1.65	2.03	16.07	10.37	50.87	22.09	49.14	4.14	4.13	5.39	6.88	32.86	33.23	33.05	33.03	36.85	103.32	104.27	108.67	104.37	84.44
BMW 2504	1.56	2.21	34.55	16.07	42.47	20.35	55.04	5.94	4.02	6.15	5.77	32.58	37.19	33.44	33.55	37.06	103.96	98.86	103.91	103.37	88.3
BMW 2505	1.55	2.51	29.38	20.1	32.97	30.61	48.22	8.95	6.12	9.22	9.07	35.35	37.06	36.06	33.48	36.9	100.19	93.41	94.93	88.87	78.41
BMW 2506	0.98	1.32	77.52	77.71	39.69	46.82	65.04	9	8.01	8.15	7.8	30.88	32.02	31.02	32	35.06	100.5	99.78	99.37	93.54	82.3
BMW 2507	1.57	3.98	51.56	27.35	35.33	13.83	44.42	4.78	4.76	5.19	4.91	33.83	36.46	35.43	34.99	37.05	109.42	102.21	108.11	102.12	90.42
BMW 2508	1.19	2.22	43.23	13.82	34.41	20.51	66.53	3.01	2.97	9.38	6.96	31.25	32.73	32.54	33.02	36.86	107.16	101.78	107.66	98.61	92.04
BMW 2509	1.75	5.21	66.57	75.16	29.72	39.36	63.49	8.03	6.92	7.42	8.04	36.49	36.58	34.58	34	36.8	105.01	95.71	94.15	88.7	80.32
BMW 2510	1.56	2.69	78.92	46.55	46.54	22.43	80.69	5.06	5.27	4.97	8.03	35.22	33.72	32.11	33.51	37.07	107.15	101.51	109.72	98.88	84.53
BMW 2511	0.92	1.33	60.02	25.82	26.38	4.24	50.72	7	3.9	3.26	6.09	36.88	38.03	37.38	36.99	37.89	103	99.94	102.93	95.63	90.62
BMW 2512	1.01	0.78	71.88	60.24	25.62	11.13	46.97	6.15	3.8	5.04	7.03	32.87	36.9	35.05	33.94	37.05	105.44	101.98	108	97.32	85.47
BMW 2513	0.97	6.33	31.88	34.82	42.47	25.45	68.49	2.15	2.72	3.42	3.09	36.87	37.07	37.88	35.48	36.8	91.94	92.21	97.43	93.07	76.32
BMW 2514	2.02	6.83	52.41	11.91	43.42	19.59	73.22	5.04	5.93	7.22	9.11	31.78	34.93	32.5	33.03	34.9	111.36	112.35	116.16	110.37	94.91
BMW 2515	1	1.19	18	10.79	43.02	26.89	75.04	4.26	3.83	7.15	6.08	30.76	32.52	32.49	32.45	33.06	105.09	103.19	107.34	98.67	92.8
BMW 2516	1.02	0.84	17.47	5.9	67.58	22.69	65.69	3.89	5	6.97	7.94	30.96	31.97	33.01	33.05	33.07	115.03	106.98	107.79	105.72	93.03
