# Supplementary material
Source: publisher figshare collection journal article supplement (https://gsajournals.figshare.com/articles/dataset/_/7862531)
Supplement: Supplementary file 3 [file 1]

**Table S5:** QTL of SIM analysis across TEs. Chromosome (Chr.), position (Pos.), support interval (SI), p-value, proportion of phenotypic variance explained ( $R^2$ ), and additive effects (Eff) of the founders Event (A), BAYP4535 (B), Ambition (C), Firl3565 (D), Format (E), Potenzial (F) and Bussard (G) relative to Julius are given for the traits powdery mildew (PM), septoria tritici blotch (STB), tan spot (TS), plant height (PH), ear emergence time (EET) and leaf angle distribution (LAD). The detection of a QTL within a test environment (TE) is specified, additionally.

| Trait    | Chr. | Pos. (cM) | SI (cM) | P-value | $R^2$ *     | Eff(A) | Eff(B) | Eff(C) | Eff(D) | Eff(E) | Eff(F) | Eff(G) | TE           |
|----------|------|-----------|---------|---------|-------------|--------|--------|--------|--------|--------|--------|--------|--------------|
| PM [1-9] |      |           |         |         | <b>31.5</b> |        |        |        |        |        |        |        |              |
|          | 1A   | 3         | 2-3     | 4.5E-07 | 9.4         | 5.6    | 0.9    | 2.3    | NA     | 2.4    | 2.4    | 2.9    | 17FS1        |
|          | 3D   | 137       | 128-137 | 1.4E-02 | 4.8         | -0.5   | -0.8   | -1.4   | 0.1    | -1.3   | 0.4    | -0.8   |              |
|          | 5A   | 16        | 14-38   | 7.1E-02 | 4.9         | -0.5   | 0.3    | -0.6   | -0.1   | -1.0   | -1.0   | 0.4    |              |
|          | 6B   | 227       | 211-230 | 3.6E-05 | 6.7         | -1.5   | -0.7   | -1.1   | 0.2    | 0.3    | -1.5   | -0.9   | 16RG, 17FS1  |
|          | 7A   | 382       | 379-384 | 6.6E-06 | 12.8        | -2.7   | -1.3   | -2.3   | -1.4   | -0.8   | -1.0   | -1.3   | 16RG, 17FS1  |
|          | 7D   | 19        | 12-22   | 9.1E-02 | 5.3         | 4.8    | -1.1   | -5.8   | NA     | -0.2   | -0.4   | -0.5   |              |
| STB [%]  |      |           |         |         | <b>27.1</b> |        |        |        |        |        |        |        |              |
|          | 1A   | 23        | 23-23   | 6.6E-02 | 6.1         | -2.1   | -3.7   | 1.9    | NA     | -2.5   | 0.2    | 11.6   |              |
|          | 1B   | 347       | 341-356 | 5.7E-03 | 5.9         | 6.1    | -0.3   | 4.8    | -4.1   | -1.2   | -8.5   | -9.0   | 17FS1        |
|          | 2B   | 94        | 86-94   | 7.8E-02 | 5.3         | -2.5   | 1.8    | -7.1   | NA     | 13.1   | -5.2   | -3.1   | 17FS1        |
|          | 2B   | 181       | 155-188 | 6.1E-02 | 4.7         | -25.6  | -6.6   | -10.8  | NA     | -6.5   | -21.5  | 0.0    | 17FS1        |
|          | 2B   | 243       | 222-254 | 3.0E-04 | 6.3         | 46.2   | -2.1   | -10.1  | -14.1  | 5.3    | 21.9   | 4.5    | 16FS1, 17FS1 |
|          | 2D   | 20        | 20-20   | 4.2E-06 | 8.5         | -8.9   | -5.9   | 1.6    | -5.6   | 10.2   | -8.7   | 3.4    | 16FS1, 17FS1 |
| TS [%]   | 4B   | 31        | 27-43   | 3.4E-02 | 4.3         | -2.8   | -12.2  | NA     | -19.7  | -19.9  | -4.0   | 7.7    |              |
|          |      |           |         |         | <b>40.5</b> |        |        |        |        |        |        |        |              |
|          | 1A   | 23        | 23-23   | 8.0E-06 | 6.8         | 9.6    | -1.4   | 2.5    | NA     | 1.9    | 2.5    | 14.1   |              |
|          | 2A   | 90        | 83-94   | 1.9E-05 | 6.6         | 6.1    | -0.6   | 0.5    | 4.7    | 6.2    | -0.8   | -6.0   | 17SL         |
|          | 2B   | 151       | 135-157 | 1.3E-04 | 4.6         | 0.6    | -5.5   | -6.1   | NA     | 0.9    | 4.4    | 0.9    |              |
|          | 2D   | 160       | 160-160 | 3.1E-05 | 6.7         | -4.5   | -2.5   | -10.5  | -7.0   | -12.1  | NA     | -13.5  | 16_FS2, 17SL |
|          | 3D   | 82        | 81-88   | 4.0E-05 | 7.1         | -10.4  | -9.2   | -5.9   | -6.1   | 2.7    | -5.7   | -3.9   | 17_FS2, 17SL |
|          | 4B   | 170       | 117-175 | 2.4E-02 | 5.2         | -5.8   | -6.1   | NA     | -3.0   | -7.7   | -3.5   | -3.8   |              |
|          | 5B   | 28        | 28-31   | 3.1E-03 | 5.0         | -4.8   | -1.8   | -3.6   | 2.8    | 1.3    | 2.7    | 4.5    |              |
|          | 7A   | 148       | 148-151 | 3.1E-04 | 10.6        | 0.0    | -6.6   | -2.8   | 2.2    | -0.6   | -1.9   | 0.6    | 16_FS2, 17SL |
|          | 7A   | 371       | 366-373 | 3.0E-04 | 4.5         | 16.8   | -4.1   | 6.9    | 3.8    | 1.3    | 4.1    | 5.5    |              |

**Table S5 (Continuation):** QTL of SIM analysis across TEs. Chromosome (Chr.), position (Pos.), support interval (SI), p-value, proportion of phenotypic variance explained ( $R^2$ ), and additive effects (Eff) of the founders Event (A), BAYP4535 (B), Ambition (C), Firl3565 (D), Format (E), Potenzial (F) and Bussard (G) relative to Julius are given for the traits powdery mildew (PM), septoria tritici blotch (STB), tan spot (TS), plant height (PH), ear emergence time (EET) and leaf angle distribution (LAD). The detection of a QTL within a test environment (TE) is specified, additionally.

| Trait     | Chr. | Pos. (cM) | SI (cM) | P-value | $R^2$ *     | Eff(A) | Eff(B) | Eff(C) | Eff(D) | Eff(E) | Eff(F) | Eff(G) | TE                               |
|-----------|------|-----------|---------|---------|-------------|--------|--------|--------|--------|--------|--------|--------|----------------------------------|
| PH [cm]   |      |           |         |         | <b>53.0</b> |        |        |        |        |        |        |        |                                  |
|           | 4B   | 80        | 68-90   | 0.0E+00 | 9.2         | 0.7    | -9.9   | NA     | -2.4   | 3.9    | 0.4    | 2.5    | 16FS1, 16FS2, 17FS1, 17FS2, 17SL |
|           | 4D   | 27        | 27-27   | 0.0E+00 | 33.6        | -3.1   | 15.2   | 4.3    | 28.6   | 15.0   | 6.3    | NA     | 16FS1, 16FS2, 17FS1, 17FS2, 17SL |
|           | 6A   | 130       | 130-130 | 1.7E-11 | 12.6        | -0.5   | 1.5    | -9.1   | -3.5   | -5.8   | -9.2   | 0.2    | 17FS1, 17FS2                     |
| EET [DaM] |      |           |         |         | <b>25.9</b> |        |        |        |        |        |        |        |                                  |
|           | 3A   | 230       | 213-230 | 5.7E-05 | 8.8         | -0.7   | 0.6    | 1.2    | 1.5    | 1.6    | 0.1    | 0.1    | 16FS1, 16FS2, 17FS1, 17FS2, 17SL |
|           | 4A   | 80        | 67-89   | 1.2E-02 | 5.2         | -0.8   | -0.7   | -2.4   | -0.7   | 0.1    | -1.0   | -2.1   | 17SL                             |
|           | 5A   | 182       | 180-185 | 3.1E-04 | 7.6         | 0.7    | 1.2    | 0.8    | 0.5    | 0.3    | 1.4    | 1.5    | 16FS1, 16FS2, 17FS1, 17FS2       |
|           | 5B   | 273       | 268-276 | 3.0E-02 | 5.7         | -0.6   | -0.4   | -1.9   | -0.3   | -0.9   | 1.6    | -0.5   | 17FS1                            |
|           | 6A   | 251       | 250-252 | 1.3E-03 | 5.0         | -0.1   | 0.0    | 0.7    | -0.8   | 0.0    | -0.9   | NA     | 16FS1                            |
|           | 7A   | 99        | 87-122  | 9.7E-03 | 5.5         | -0.8   | -0.1   | -1.0   | -1.1   | 0.0    | -0.4   | -0.5   | 16FS1, 16FS2, 17SL               |
| LAD [1-9] |      |           |         |         | <b>32.3</b> |        |        |        |        |        |        |        |                                  |
|           | 2B   | 92        | 92-100  | 3.9E-02 | 5.8         | -0.7   | 0.2    | 0.8    | NA     | 0.0    | 0.3    | -0.1   |                                  |
|           | 2B   | 174       | 167-180 | 9.6E-10 | 14.4        | -1.1   | 0.7    | -0.1   | NA     | 0.3    | -0.3   | 0.8    | 16FS1, 16FS2                     |
|           | 2D   | 166       | 164-167 | 2.1E-04 | 5.6         | -0.7   | 0.3    | 1.3    | 1.1    | -0.2   | NA     | -2.3   | 17FS1                            |
|           | 4B   | 80        | 70-89   | 2.9E-03 | 6.4         | 0.8    | 1.0    | NA     | 0.5    | 0.5    | -0.4   | 0.4    | 16FS1                            |
|           | 6A   | 40        | 36-46   | 1.9E-05 | 6.6         | 0.1    | -0.4   | -0.7   | -0.7   | 0.4    | 0.3    | 0.2    | 16FS1                            |
|           | 7D   | 160       | 160-163 | 5.6E-03 | 4.6         | -1.0   | NA     | NA     | -2.6   | -2.0   | NA     | NA     | 17SL                             |

\* For each trait the explained phenotypic variance of the model fitting all detected QTL simultaneously is given in bold values above the individual  $R^2$  values for each QTL.
