# Supplementary material
Source: publisher figshare collection journal article supplement (https://gsajournals.figshare.com/articles/dataset/_/7862531)
Supplement: Supplementary file 4 [file 1]

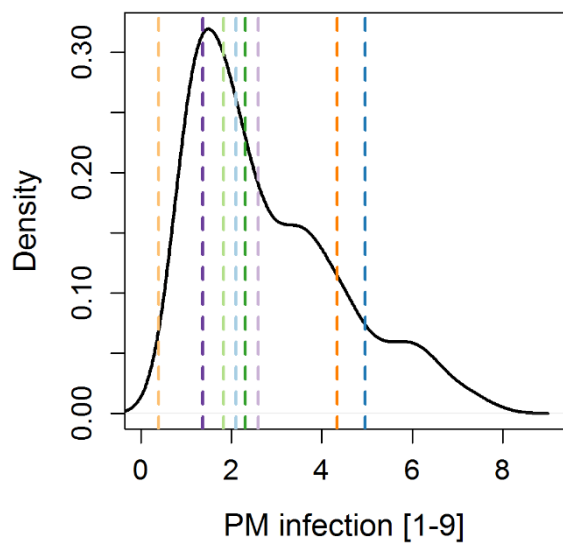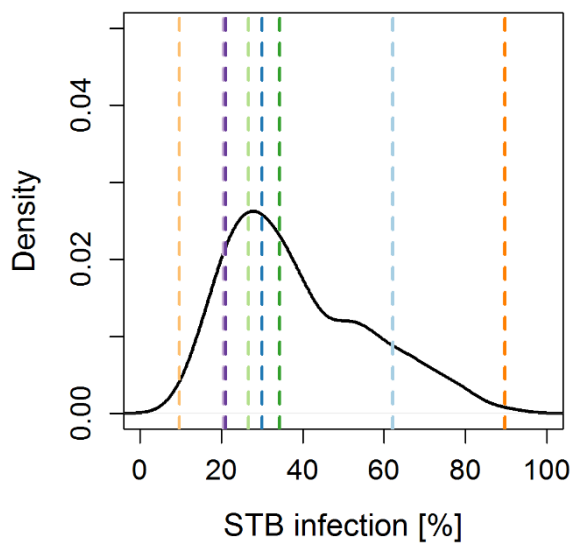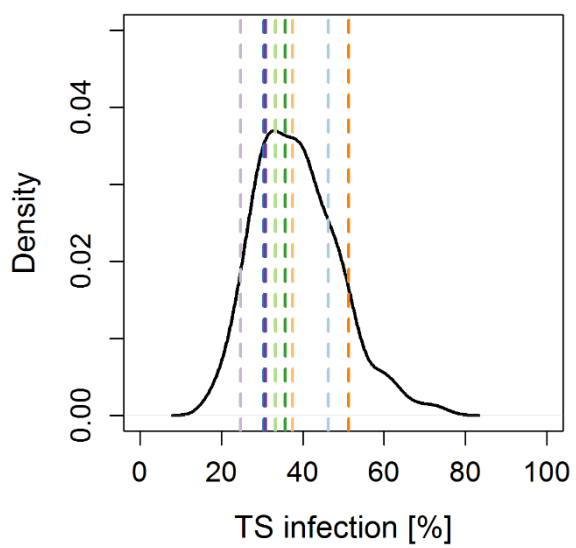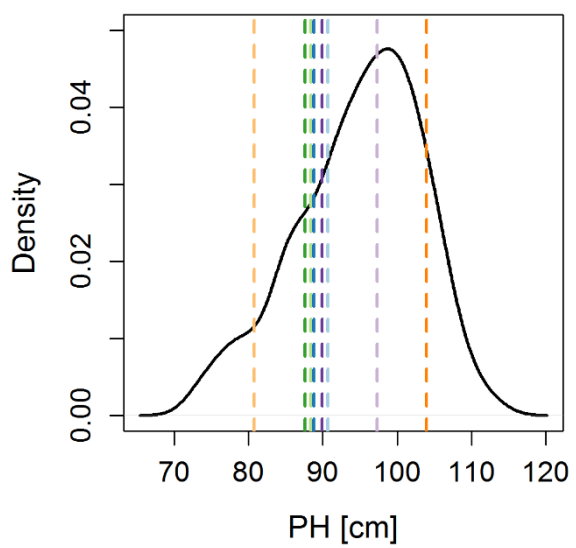

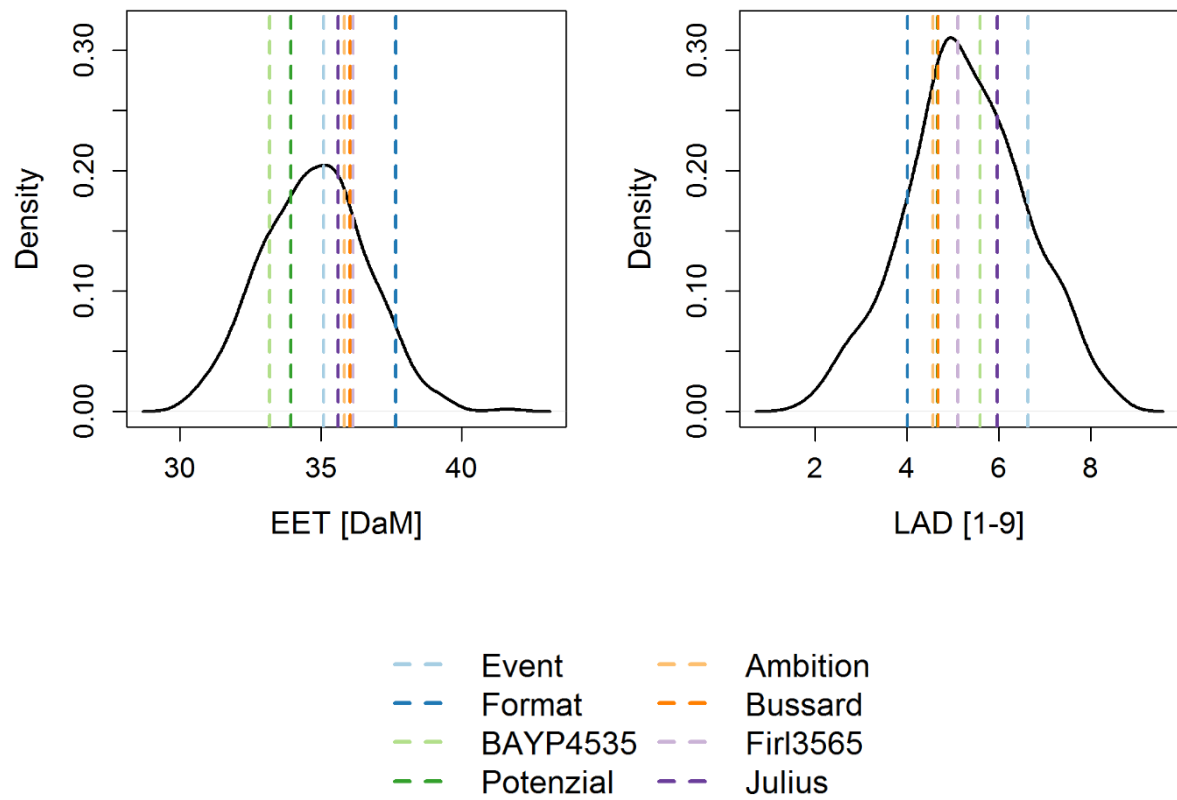

**Figure S3:** Density plots of adjusted means across test environments. Data are shown for the traits powdery mildew (PM), septoria tritici blotch (STB), tan spot (TS), plant height (PH), ear emergence time (EET), and leaf angle distribution (LAD). Vertical dotted lines indicate the values of the parental lines.
