# Supplementary material
Source: publisher figshare collection journal article supplement (https://gsajournals.figshare.com/articles/dataset/_/7862531)
Supplement: Supplementary file 5 [file 1]

**Table S8:** QTL of IBS analysis across TEs. Chromosome (Chr.), position (Pos.), support interval (SI), FDR p-value, proportion of phenotypic variance explained ( $R^2$ ), and additive effect (Eff.) of the minor allele are given for the traits powdery mildew (PM), septoria tritici blotch (STB), tan spot (TS), plant height (PH), ear emergence time (EET) and leaf angle distribution (LAD). The detection of a QTL within a TE is specified (TE), additionally.

| Trait     | Chr. | Pos. (cM) | SI (cM) | P-value | $R^2$ *     | Eff.  | TE                               |
|-----------|------|-----------|---------|---------|-------------|-------|----------------------------------|
| PM[1-9]   |      |           |         |         | <b>25.3</b> |       |                                  |
|           | 1A   | 3         | 0-3     | 2.6E-06 | 8.3         | -1.6  | 16RG, 17FS1                      |
|           | 6B   | 217       | 217-217 | 9.9E-03 | 4.3         | -1.1  | 16RG, 17FS1                      |
|           | 7A   | 387       | 384-387 | 2.9E-09 | 11.7        | -1.8  | 16RG, 17FS1                      |
| STB [%]   |      |           |         |         | <b>17.7</b> |       |                                  |
|           | 1B   | 329       | 329-329 | 8.5E-03 | 4.1         | 7.2   | 17FS1                            |
|           | 2B   | 229       | 214-237 | 9.7E-04 | 5.4         | -8.5  | 17FS1                            |
|           | 2D   | 20        | 20-20   | 1.1E-05 | 8.6         | -10.7 | 16FS1, 17FS1                     |
| TS [%]    |      |           |         |         | <b>41.9</b> |       |                                  |
|           | 2A   | 93        | 93-94   | 4.0E-03 | 3.6         | 6.8   |                                  |
|           | 2A   | 158       | 158-161 | 7.0E-03 | 3.2         | 5.8   |                                  |
|           | 2B   | 161       | 161-161 | 8.6E-03 | 3.0         | -4.9  |                                  |
|           | 2B   | 229       | 210-228 | 8.5E-05 | 6.0         | -5.4  | 16FS2, 17FS2                     |
|           | 2D   | 160       | 160-164 | 3.1E-04 | 5.0         | 5.2   | 16FS2                            |
|           | 3A   | 330       | 330-331 | 6.6E-03 | 3.2         | -3.9  | 16FS2                            |
|           | 4A   | 138       | 129-139 | 1.3E-03 | 4.2         | -4.8  | 16FS2, 17FS2                     |
|           | 4D   | 27        | 27-27   | 4.4E-03 | 3.5         | 5.2   | 17FS2, 17SL                      |
|           | 5A   | 211       | 208-210 | 2.6E-03 | 3.8         | 4.7   |                                  |
|           | 5B   | 30        | 30-30   | 4.6E-03 | 3.5         | -4.0  | 17SL                             |
|           | 5B   | 100       | 100-106 | 4.6E-03 | 3.5         | -4.1  | 16FS2                            |
|           | 6A   | 250       | 249-250 | 3.9E-05 | 6.6         | -5.9  | 16FS2, 17FS2                     |
|           | 6B   | 249       | 245-249 | 1.3E-04 | 5.7         | 5.2   | 17FS2, 17SL                      |
|           | 7A   | 148       | 138-149 | 5.8E-08 | 9.9         | -9.3  | 16FS2, 17FS2, 17SL               |
|           | 7A   | 213       | 192-214 | 1.3E-03 | 4.2         | -5.2  | 17FS2, 17SL                      |
|           | 7B   | 56        | 56-56   | 8.7E-04 | 4.4         | -6.1  | 17SL                             |
|           | 7B   | 248       | 248-248 | 4.6E-03 | 3.5         | -4.1  | 17SL                             |
| PH [cm]   |      |           |         |         | <b>51.7</b> |       |                                  |
|           | 4B   | 75        | 75-75   | 1.3E-04 | 5.8         | -7.8  | 16FS1, 16FS2, 17FS1, 17FS2, 17SL |
|           | 4D   | 27        | 27-27   | 1.7E-32 | 33.0        | -12.5 | 16FS1, 16FS2, 17FS1, 17FS2, 17SL |
|           | 6A   | 160       | 124-160 | 1.4E-08 | 10.7        | 5.6   | 16FS1, 16FS2, 17FS1, 17FS2, 17SL |
| EET [DaM] |      |           |         |         | <b>24.6</b> |       |                                  |
|           | 3A   | 229       | 215-244 | 2.9E-06 | 9.3         | -1.1  | 16FS1, 16FS2, 17FS1, 17FS2, 17SL |
|           | 5A   | 182       | 182-206 | 5.7E-05 | 7.6         | 1.2   | 16FS1, 16FS2, 17FS1, 17FS2, 17SL |
|           | 5B   | 103       | 100-105 | 1.7E-03 | 4.7         | 0.8   | 16FS2, 17FS1, 17SL               |
|           | 5D   | 234       | 234-234 | 1.4E-03 | 5.3         | 1.2   | 16FS1, 16FS2, 17FS1              |
|           | 6A   | 250       | 250-251 | 1.9E-03 | 4.7         | 0.9   | 16FS1, 17FS1                     |
|           | 6D   | 66        | 66-67   | 2.9E-03 | 4.3         | 0.8   | 16FS2, 17FS1, 17FS2              |
| LAD [1-9] |      |           |         |         | <b>26.3</b> |       |                                  |
|           | 2B   | 173       | 127-205 | 4.2E-08 | 10.1        | 0.8   | 16FS1, 16FS2, 17FS1, 17SL        |
|           | 2D   | 167       | 166-167 | 2.7E-03 | 4.0         | -0.6  | 16FS1                            |
|           | 3A   | 184       | 184-184 | 8.7E-03 | 3.3         | -1.1  |                                  |
|           | 4B   | 75        | 75-75   | 4.7E-03 | 3.7         | 1.0   | 16FS1                            |
|           | 5B   | 39        | 39-41   | 4.7E-03 | 3.8         | -0.5  | 17FS1                            |
|           | 7A   | 90        | 90-90   | 2.9E-03 | 4.1         | 0.6   | 17FS1, 17SL                      |

\* For each trait the explained phenotypic variance of the model fitting all detected QTL simultaneously is given in bold values above the individual  $R^2$  values for each QTL.
