# Supplementary material
Source: publisher figshare collection journal article supplement (https://gsajournals.figshare.com/articles/dataset/_/7862531)
Supplement: Supplementary file 6 [file 1]

**Table S7:** QTL of IBD analysis across TEs. Chromosome (Chr.), position (Pos.), support interval (SI), FDR p-value, proportion of phenotypic variance explained ( $R^2$ ), and additive effects (Eff) of the founders Event (A), BAYP4535 (B), Ambition (C), Firl3565 (D), Format (E), Potenzial (F) and Bussard (G) relative to Julius are given for the traits powdery mildew (PM), septoria tritici blotch (STB), tan spot (TS), plant height (PH), ear emergence time (EET) and leaf angle distribution (LAD). The detection of a QTL within a TE is specified (TE), additionally.

| Trait    | Chr. | Pos. (cM) | SI (cM) | P-value | $R^2$ *     | Eff(A) | Eff(B) | Eff(C) | Eff(D) | Eff(E) | Eff(F) | Eff(G) | TE           |
|----------|------|-----------|---------|---------|-------------|--------|--------|--------|--------|--------|--------|--------|--------------|
| PM [1-9] |      |           |         |         | <b>33.3</b> |        |        |        |        |        |        |        |              |
|          | 1A   | 3         | 2-3     | 7.3E-05 | 8.7         | 0.8    | -0.7   | 1.0    | 1.0    | 1.2    | 1.3    | 1.1    | 17FS1        |
|          | 2B   | 134       | 132-134 | 4.4E-03 | 6.1         | 0.6    | -0.1   | -2.5   | 0.6    | 2.7    | 0.1    | 1.3    | 17FS1        |
|          | 6B   | 226       | 225-227 | 5.3E-03 | 5.9         | -1.7   | -0.8   | -1.4   | -0.8   | -0.1   | -0.5   | -1.0   | 17FS1        |
|          | 7A   | 381       | 359-390 | 3.6E-07 | 12.4        | -1.0   | -0.7   | -2.3   | -1.1   | -0.4   | -0.6   | -0.9   | 17FS1        |
|          | 7D   | 19        | 12-22   | 1.1E-03 | 7.1         | -3.9   | -1.9   | -5.4   | 8.5    | -0.3   | -0.4   | -0.8   | 17FS1        |
| STB [%]  |      |           |         |         | <b>24.9</b> |        |        |        |        |        |        |        |              |
|          | 1A   | 23        | 23-26   | 8.3E-03 | 5.8         | -1.6   | -7.1   | 3.5    | -5.1   | 3.0    | -2.7   | 17.6   | 17FS1        |
|          | 2B   | 92        | 92-92   | 8.9E-03 | 5.7         | -0.8   | 6.2    | 4.2    | -11.3  | 26.9   | -4.4   | 5.1    |              |
|          | 2B   | 242       | 229-254 | 5.4E-03 | 6.7         | 27.4   | -3.4   | -9.1   | -3.4   | 9.3    | 10.6   | 8.7    | 17FS1        |
|          | 2D   | 20        | 20-21   | 1.1E-03 | 8.3         | -8.8   | -6.5   | 5.3    | -6.3   | 10.8   | -8.3   | 4.8    | 17FS1        |
|          | 5B   | 303       | 303-303 | 8.0E-03 | 5.8         | -11.5  | -12.4  | -17.8  | -11.0  | -0.4   | -14.6  | -14.4  |              |
| TS [%]   |      |           |         |         | <b>29.9</b> |        |        |        |        |        |        |        |              |
|          | 1A   | 23        | 0-26    | 4.5E-03 | 4.8         | 6.0    | 2.9    | 3.6    | 5.6    | 6.3    | 5.3    | 15.8   | 17SL         |
|          | 1A   | 56        | 56-63   | 6.4E-05 | 8.3         | 10.2   | 5.3    | 9.9    | 9.1    | 9.8    | 12.3   | 19.3   | 17SL         |
|          | 2A   | 90        | 73-115  | 1.9E-04 | 7.6         | 7.4    | -1.7   | 2.8    | 6.5    | 2.1    | -1.4   | -5.5   | 17SL         |
|          | 2A   | 143       | 142-190 | 1.4E-03 | 6.1         | 11.0   | -2.5   | 1.3    | -3.5   | -4.7   | -0.2   | -4.6   | 17SL         |
|          | 2A   | 275       | 264-288 | 2.2E-03 | 5.7         | -4.9   | -8.3   | -6.0   | -9.7   | 1.5    | -5.5   | -6.2   | 17SL         |
|          | 2B   | 92        | 81-94   | 4.5E-03 | 4.8         | -3.4   | -0.6   | 1.4    | 0.9    | 10.7   | -0.9   | -3.8   |              |
|          | 2B   | 157       | 145-163 | 3.9E-03 | 5.0         | 3.2    | 1.1    | 52.9   | -41.0  | 9.0    | 12.5   | 4.8    |              |
|          | 2B   | 222       | 181-276 | 1.6E-05 | 9.4         | 23.4   | 1.5    | 31.7   | -46.3  | 6.3    | 11.2   | 7.2    | 16FS2, 17FS2 |
|          | 2D   | 164       | 160-167 | 6.9E-05 | 8.3         | -1.4   | -7.0   | -0.9   | -17.5  | -12.8  | -2.1   | -8.6   | 17FS2, 17SL  |
|          | 3A   | 321       | 319-324 | 1.8E-03 | 5.9         | 9.9    | 4.1    | 5.6    | 7.9    | 4.7    | 3.5    | 8.5    | 17SL         |
|          | 3B   | 80        | 17-84   | 1.7E-03 | 5.9         | 1.0    | 0.4    | 10.7   | 1.6    | 7.5    | 5.2    | 2.8    | 17SL         |
|          | 3B   | 322       | 321-322 | 5.3E-03 | 4.6         | 2.8    | 5.9    | 0.7    | 9.6    | 4.6    | 3.4    | 2.8    | 17FS2, 17SL  |
|          | 3D   | 84        | 81-122  | 1.4E-04 | 7.8         | -9.1   | -15.6  | -4.7   | 0.3    | 8.6    | -4.8   | -5.6   | 17FS2, 17SL  |
|          | 4A   | 167       | 162-169 | 3.0E-03 | 5.4         | 5.1    | 3.4    | 11.5   | 11.6   | 4.8    | 8.6    | 1.8    | 17SL         |
|          | 4B   | 172       | 122-215 | 5.5E-03 | 4.6         | -6.4   | -5.0   | -7.7   | -4.5   | -8.6   | -5.8   | -11.1  | 17FS2, 17SL  |

**Table S7 (Continuation):** QTL of IBD analysis across TEs. Chromosome (Chr.), position (Pos.), support interval (SI), FDR p-value, proportion of phenotypic variance explained ( $R^2$ ), and additive effects (Eff) of the founders Event (A), BAYP4535 (B), Ambition (C), Firl3565 (D), Format (E), Potenzial (F) and Bussard (G) relative to Julius are given for the traits powdery mildew (PM), septoria tritici blotch (STB), tan spot (TS), plant height (PH), ear emergence time (EET) and leaf angle distribution (LAD). The detection of a QTL within a TE is specified (TE), additionally.

| Trait     | Chr. | Pos. (cM) | SI (cM) | P-value | $R^2$ *     | Eff(A) | Eff(B) | Eff(C) | Eff(D) | Eff(E) | Eff(F) | Eff(G) | TE                               |
|-----------|------|-----------|---------|---------|-------------|--------|--------|--------|--------|--------|--------|--------|----------------------------------|
| TS [%]    |      |           |         |         |             |        |        |        |        |        |        |        |                                  |
|           | 5A   | 185       | 170-216 | 1.1E-03 | 6.3         | -7.8   | -7.4   | -12.2  | -8.2   | -1.5   | -7.5   | -9.3   | 17SL                             |
|           | 5B   | 30        | 28-31   | 4.3E-03 | 4.9         | -0.9   | -2.8   | -4.0   | 3.7    | -3.2   | 2.3    | 4.2    |                                  |
|           | 6A   | 252       | 242-265 | 2.2E-03 | 5.7         | 3.5    | -3.9   | -3.6   | 1.7    | -3.4   | -0.2   | 6.1    | 17SL                             |
|           | 6B   | 243       | 235-250 | 2.8E-03 | 5.4         | -2.0   | -6.5   | -10.9  | -4.9   | -5.6   | -10.6  | -6.2   | 17SL                             |
|           | 6D   | 51        | 45-51   | 5.9E-03 | 4.5         | -13.6  | -8.5   | -10.3  | -6.2   | -9.0   | -5.2   | -1.7   | 17FS2, 17SL                      |
|           | 7A   | 148       | 87-206  | 4.9E-06 | 10.3        | -1.5   | -8.3   | -2.6   | 4.3    | 1.9    | 1.8    | 2.3    | 16FS2, 17FS2, 17SL               |
|           | 7A   | 242       | 235-245 | 2.8E-03 | 5.5         | -5.3   | -6.6   | 2.5    | -3.8   | -0.5   | -1.6   | 0.3    | 17SL                             |
|           | 7B   | 60        | 56-70   | 2.3E-03 | 5.7         | -12.8  | -4.0   | -9.2   | -14.9  | -10.9  | -11.7  | -6.7   | 16FS2, 17SL                      |
| PH [cm]   |      |           |         |         |             |        |        |        |        |        |        |        |                                  |
|           |      |           |         |         | <b>53.1</b> |        |        |        |        |        |        |        |                                  |
|           | 4B   | 72        | 68-148  | 9.3E-05 | 8.3         | -4.1   | -8.5   | 0.5    | -1.2   | 3.1    | -0.6   | 5.5    | 16FS1, 16FS2, 17FS1, 17FS2, 17SL |
|           | 4D   | 27        | 0-87    | 1.1E-28 | 33.6        | -8.0   | 14.2   | 4.9    | 18.5   | 15.0   | 10.1   | 10.4   | 16FS1, 16FS2, 17FS1, 17FS2, 17SL |
|           | 6A   | 158       | 124-173 | 4.2E-07 | 11.4        | -0.8   | -2.4   | -10.4  | -1.8   | -4.7   | -9.0   | 1.8    | 16FS1, 16FS2, 17FS1, 17FS2, 17SL |
| EET [DaM] |      |           |         |         |             |        |        |        |        |        |        |        |                                  |
|           |      |           |         |         | <b>23.9</b> |        |        |        |        |        |        |        |                                  |
|           | 3A   | 229       | 203-230 | 7.9E-04 | 8.0         | 1.4    | 0.9    | 1.3    | 0.1    | 1.4    | -0.1   | 0.1    | 16FS1, 17FS1, 17SL               |
|           | 5A   | 183       | 178-185 | 3.6E-03 | 6.8         | 0.5    | 0.7    | 0.3    | 0.7    | 0.1    | 1.6    | 1.5    | 16FS1, 17FS1                     |
|           | 5B   | 104       | 89-105  | 3.5E-03 | 6.3         | 0.8    | 1.5    | -0.1   | -0.9   | 0.5    | -0.1   | 0.0    | 17SL                             |
|           | 5D   | 234       | 234-237 | 7.3E-03 | 5.7         | 1.1    | -1.1   | 0.1    | -0.3   | 0.1    | 0.1    | -0.1   | 16FS1                            |
|           | 7A   | 106       | 106-106 | 6.8E-03 | 5.7         | -1.0   | 0.2    | -1.1   | -1.4   | -0.1   | -0.4   | -0.5   | 16FS1                            |
| LAD [1-9] |      |           |         |         |             |        |        |        |        |        |        |        |                                  |
|           |      |           |         |         | <b>27.4</b> |        |        |        |        |        |        |        |                                  |
|           | 2B   | 172       | 113-213 | 1.1E-08 | 13.4        | -1.9   | 0.3    | -3.1   | 1.7    | -0.3   | -0.6   | 0.3    | 16FS1, 16FS2, 17FS1, 17SL        |
|           | 2D   | 166       | 166-167 | 8.4E-03 | 5.2         | -0.2   | 0.9    | -0.4   | 0.8    | -0.4   | 1.5    | -1.1   |                                  |
|           | 4B   | 72        | 72-75   | 4.5E-03 | 5.7         | 1.0    | 1.2    | -0.2   | 0.5    | 0.3    | -0.5   | -0.4   | 16FS1                            |
|           | 6A   | 40        | 37-46   | 8.3E-04 | 6.7         | 0.0    | -0.6   | -0.8   | -0.6   | 0.6    | 0.3    | -0.1   | 16FS1                            |

\* For each trait the explained phenotypic variance of the model fitting all detected QTL simultaneously is given in bold values above the individual  $R^2$  values for each QTL.
