# Supplementary material
Source: publisher figshare collection journal article supplement (https://gsajournals.figshare.com/articles/dataset/_/7862531)
Supplement: Supplementary file 7 [file 1]

**Table S4:** Correlation coefficients. Phenotypic (below diagonal) and genotypic (above diagonal) correlation matrix of the trait powdery mildew (PM), septoria tritici blotch (STB), tan spot (TS), plant height (PH), ear emergence time (EET), and leaf angle distribution (LAD).

|            | <b>PM</b> | <b>STB</b> | <b>TS</b> | <b>PH</b>           | <b>EET</b>          | <b>LAD</b>          |
|------------|-----------|------------|-----------|---------------------|---------------------|---------------------|
| <b>PM</b>  | 1         | n.d.       | n.d.      | n.d.                | n.d.                | n.d.                |
| <b>STB</b> | 0.22*     | 1          | n.d.      | -0.18 <sup>++</sup> | -0.38 <sup>++</sup> | 0.32 <sup>++</sup>  |
| <b>TS</b>  | 0.05      | 0.33*      | 1         | -0.24 <sup>++</sup> | -0.47 <sup>++</sup> | -0.20 <sup>+</sup>  |
| <b>PH</b>  | -0.03     | -0.17*     | -0.18*    | 1                   | 0.07                | 0.03                |
| <b>EET</b> | 0.05      | -0.31*     | -0.38*    | 0.06                | 1                   | -0.18 <sup>++</sup> |
| <b>LAD</b> | 0.08      | 0.15       | -0.05     | 0.03                | -0.15               | 1                   |

n.d. Not determined.

+ / <sup>++</sup> Coefficient exceeds once/twice its standard error.

\* Significant at  $p < 0.001$ .
