# Supplementary material
Source: publisher figshare collection journal article supplement (https://gsajournals.figshare.com/articles/dataset/_/7862531)
Supplement: Supplementary file 8 [file 1]

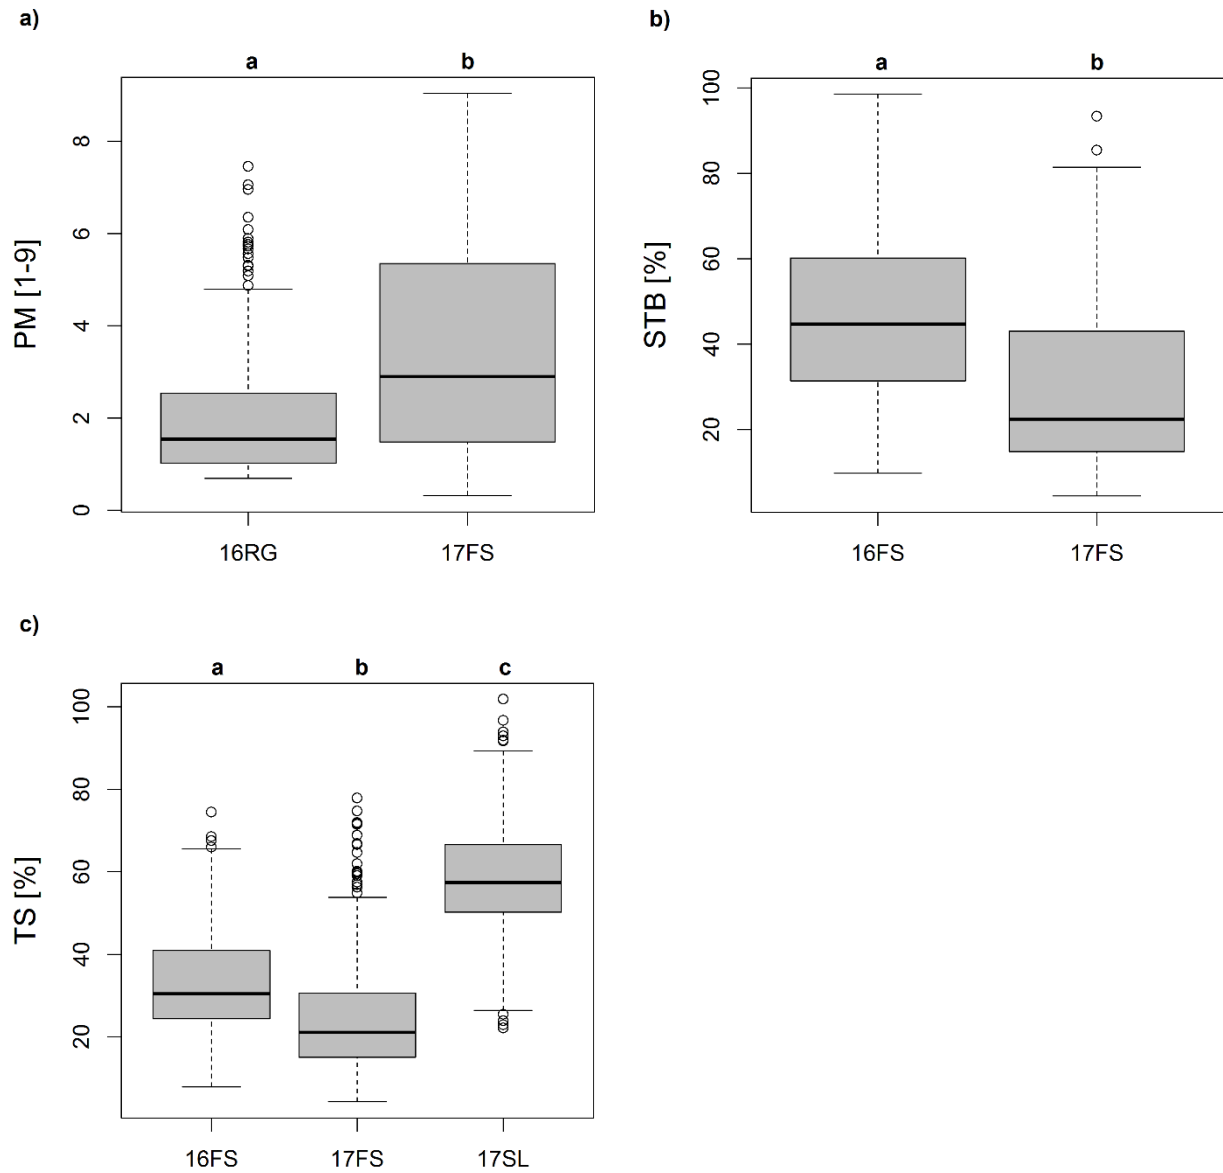

**Figure S1:** Distribution of phenotypic data within the test environments. a) Powdery mildew, b) Septoria tritici blotch, and c) Tan spot. Small letters above each plot indicate whether the mean differs between the test environments at  $p < 0.05$ .
