# Supplementary material
Source: publisher figshare collection journal article supplement (https://gsajournals.figshare.com/articles/dataset/_/7862531)
Supplement: Supplementary file 9 [file 1]

### Powdery mildew

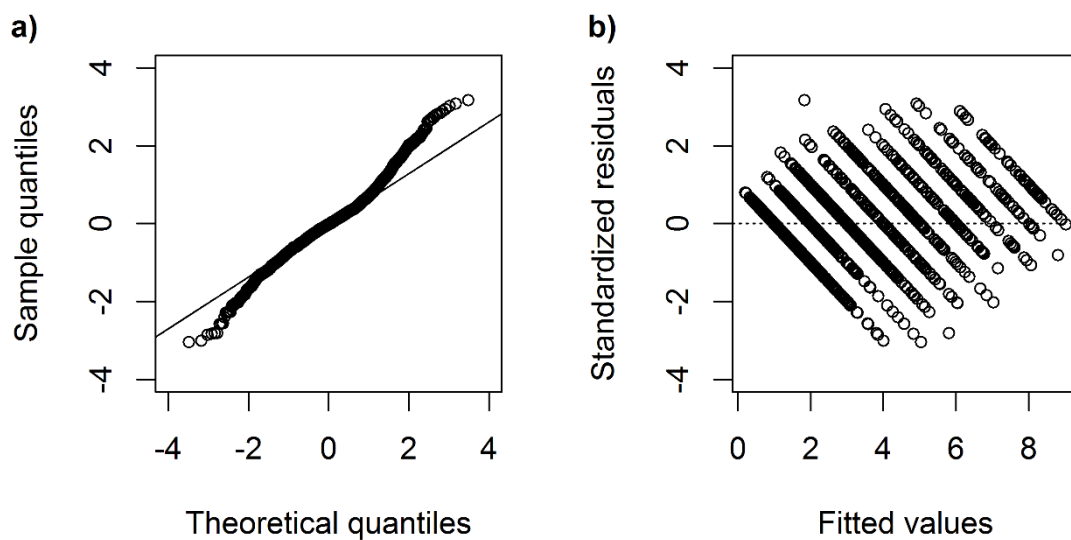

### Septoria tritici blotch

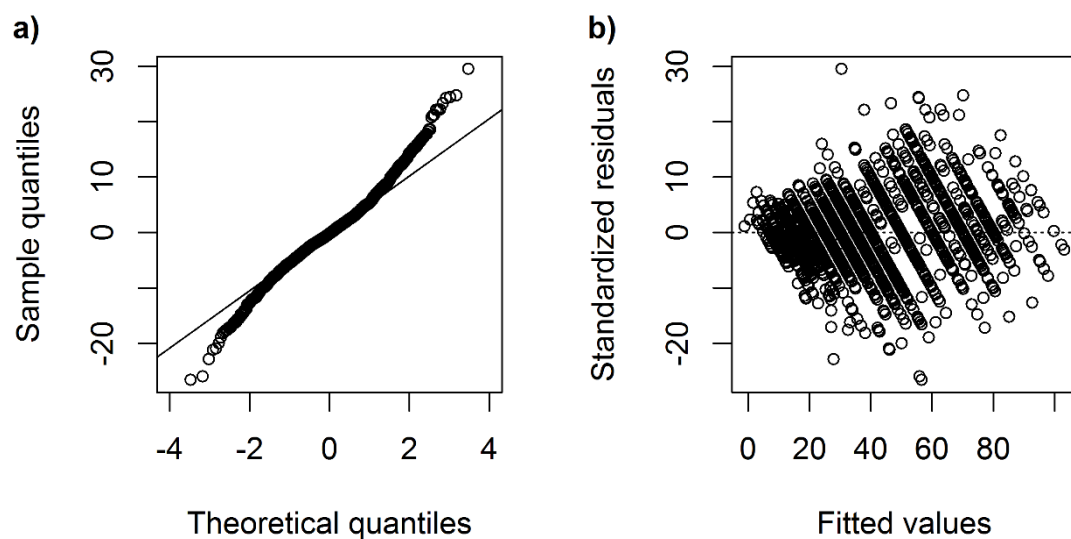

### Tan spot

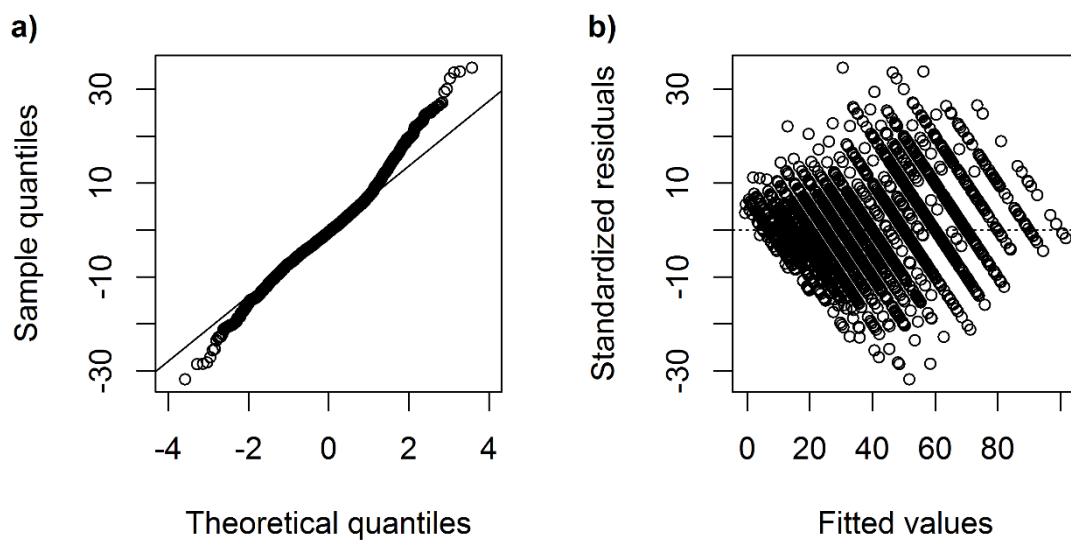

Plant height

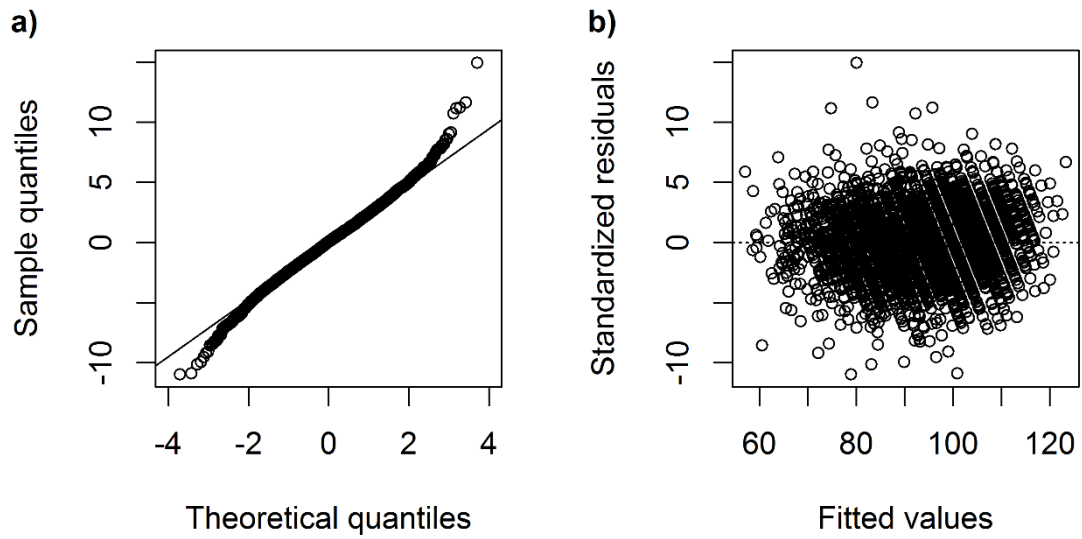

Heading date

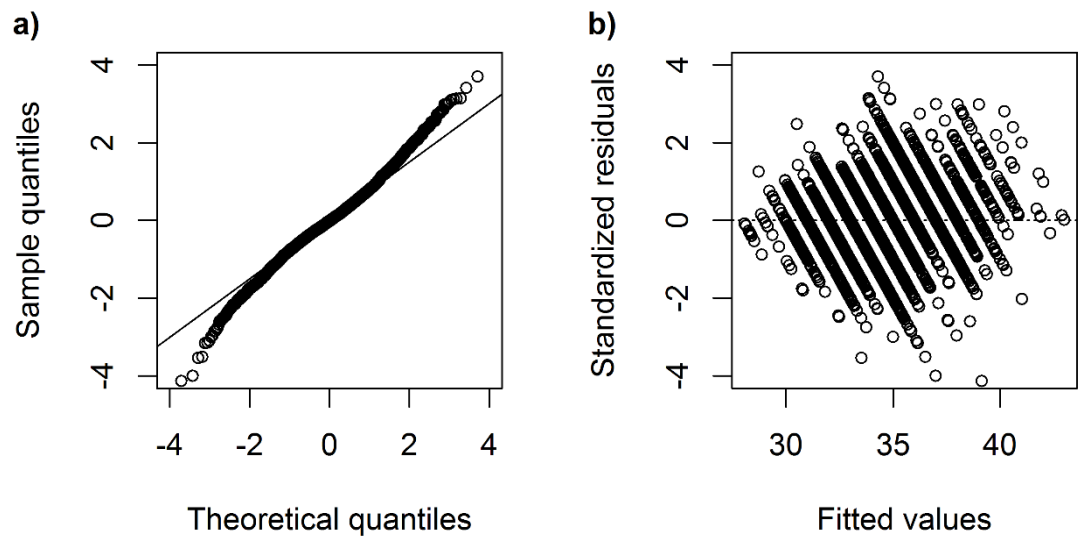

Leaf angle distribution

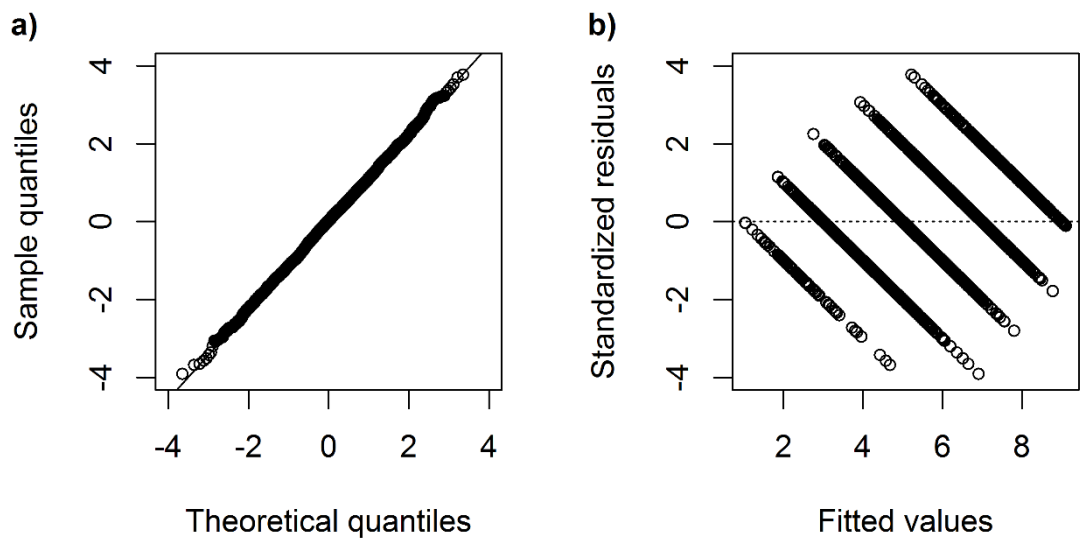

**Figure S2:** a) normal QQ plot and b) residual vs. fitted diagnostic plot for the adjusted means across test environments.
